# Supplementary material for: Doped MXene combinations as highly efficient bifunctional and multifunctional catalysts for water splitting and metal–air batteries
Source: Royal Society of Chemistry journal article supplement (doi:10.1039/d2ta06297f), 2022-01-01
Supplement: d2ta06297f1.pdf [file d2ta06297f1.pdf]

*Supplementary Information*  
*for*

**Doped MXene Combinations as Highly Efficient Bifunctional and Multifunctional  
Catalysts for Water Splitting and Metal-Air Batteries**

*Rohit Anand, Babu Ram, Muhammad Umer, Mohammad Zafari, Sohaib Umer, Geunsik  
Lee\*, and Kwang S. Kim\**

Center for Superfunctional Materials, Department of Chemistry, Ulsan National Institute of  
Science and Technology (UNIST), 50 UNIST-gil, Ulsan 44919, South Korea

\*E-mail: gslee@unist.ac.kr, kimks@unist.ac.kr

### Supplementary Note:

The chemical potential of the  $H^+$  and  $e^-$  pair can be replaced by  $1/2H_2(g)$  as these two are in equilibrium at standard conditions. Since it is difficult to extract exact free energy of intermediates in solution, the approximate adsorption free energy is calculated relative to the amount of  $H_2O$  and  $H_2$  in the gas phase, defined as:

$$\begin{aligned}\Delta G_{O^*} &= \Delta G(H_2O(g) + * \rightarrow O^* + H_2(g)) \\ &= \mu_{O^*} + \mu_{H_2} - \mu_{H_2O} - \mu_* \\ &= \left( (E_{O^*} + E_{H_2} - E_{H_2O} - E_*) + (E_{ZPE(O^*)} + E_{ZPE(H_2)} - E_{ZPE(H_2O)} - E_{ZPE(*)}) - T \right. \\ &\quad \left. \times (S_{O^*} + S_{H_2} - S_{H_2O} - S_*) \right)\end{aligned}$$

$$\begin{aligned}\Delta G_{OH^*} &= \Delta G(H_2O(g) + * \rightarrow OH^* + 1/2H_2(g)) \\ &= \mu_{OH^*} + 0.5\mu_{H_2} - \mu_{H_2O} - \mu_* \\ &= \left( (E_{OH^*} + 0.5E_{H_2} - E_{H_2O} - E_*) + (E_{ZPE(OH^*)} + 0.5E_{ZPE(H_2)} - E_{ZPE(H_2O)} - E_{ZPE(*)}) \right. \\ &\quad \left. - T \times (S_{OH^*} + S_{0.5 \times H_2} - S_{H_2O} - S_*) \right)\end{aligned}$$

$$\begin{aligned}\Delta G_{OOH^*} &= \Delta G(2H_2O(g) + * \rightarrow OOH^* + 3/2H_2(g)) \\ &= \mu_{OOH^*} + 1.5\mu_{H_2} - 2\mu_{H_2O} - \mu_* \\ &= \left( (E_{OOH^*} + 1.5E_{H_2} - 2E_{H_2O} - E_*) \right. \\ &\quad \left. + (E_{ZPE(OOH^*)} + 1.5E_{ZPE(H_2)} - 2E_{ZPE(H_2O)} - E_{ZPE(*)}) - T \right. \\ &\quad \left. \times (S_{OOH^*} + 1.5S_{H_2} - 2S_{H_2O} - S_*) \right)\end{aligned}$$

$$\begin{aligned}\Delta G_{H^*} &= \Delta G(H^+ + e^- * \rightarrow H^*) \\ &= \mu_{H^*} - \mu_{H^+} - \mu_{e^-} - \mu_*\end{aligned}$$

$$= \left( (E_{H^*} - 0.5E_{H_2} - E_*) + (E_{ZPE(H^*)} - 0.5E_{ZPE(H_2)} - E_{ZPE(*)}) - T \right) \\ \times (S_{H^*} - 0.5S_{H_2} - S_*)$$

The reaction free energy ( $\Delta G_1, \Delta G_2, \Delta G_3, \Delta G_4$ ) for OER can be written in terms of adsorption free energy using the following equations:

$$\begin{aligned} \Delta G_1 &= \Delta G_{OH^*} \\ \Delta G_2 &= \Delta G_{O^*} - \Delta G_{OH^*} \\ \Delta G_3 &= \Delta G_{OOH^*} - \Delta G_{O^*} \\ \Delta G_4 &= 4.92 - \Delta G_{OOH^*} \end{aligned}$$

The reaction free energy ( $\Delta G'_1, \Delta G'_2, \Delta G'_3, \Delta G'_4$ ) for ORR can be written in terms of adsorption free energy using the following equations:

$$\begin{aligned} \Delta G'_1 &= \Delta G_{OOH^*} - 4.92 \\ \Delta G'_2 &= \Delta G_{O^*} - \Delta G_{OOH^*} \\ \Delta G'_3 &= \Delta G_{OH^*} - \Delta G_{O^*} \\ \Delta G'_4 &= -\Delta G_{OH^*} \end{aligned}$$

The theoretical overpotential for OER, ORR, and HER are calculated using the following equations:

$$\begin{aligned} \eta^{OER} &= \max(\Delta G_1, \Delta G_2, \Delta G_3, \Delta G_4)/e - 1.23 \\ \eta^{ORR} &= \max(\Delta G'_1, \Delta G'_2, \Delta G'_3, \Delta G'_4)/e + 1.23 \\ \eta^{HER} &= -|\Delta G_{H^*}|/e \end{aligned}$$

### Machine Learning descriptors and models

In this section, we report the explored descriptors for the classification of MXene combinations into good and bad catalysts for HER/OER/ORR. We searched for the features containing geometric, atomic, and intrinsic factors. Since we have considered  $M_2M'X_2O_2$  type out-of-plane

MXene combinations for our study, the features based on M and M' properties have abbreviation 1 and 2, respectively. The considered features are atomic number (Z1 and Z2), valence d-electrons (DE1 and DE2), first ionization energy (IE1 and IE2), Pauling electronegativity (EN1 and EN2), electron affinity (EA1 and EA2), melting point (MP1 and MP2), boiling point (BP1 and BP2), metallic radius (RC1 and RC2), metal van der Waal's radius (RV1 and RV2), and density (D1 and D2). In addition, we also considered DFT-based features: distance between adsorbed O, OH, and OOH and doped TM (namely d-O, d-OH, and d-OOH), respectively. Also, we considered distance between doped TM and adjacent surface oxygen (d-SO), distance between two surface adjacent oxygen close to the active site (d-SO2), embedding energy (Ee), difference between embedding and cohesive energy (E-C), and distance between doped TM and hydrogen (d-h).

The considered machine learning algorithms: Random Forest (RF), Gradient Boosting (GB), Support Vector classification (SVC), Bagging (BG), Naïve Bayes (NB), CatBoost (CB), Decision Tree (DT), k-nearest neighbors (KNN), Adaboost (AB), and Logistic Regression. The Pearson correlation matrix is plotted for feature selection, the features with high correlation (Pearson correlation coefficient > 0.7) are neglected and the features showing high correlation with the target are considered. In addition, the feature importance of reduced features is explored to understand the most contributing features in the best performing models for HER/OER/ORR. The confusion matrix also known as error matrix visualizes and summarizes the performance of classification algorithm. In our results, it shows the percentage of actual levels predicted correctly.

Supplementary Figures:

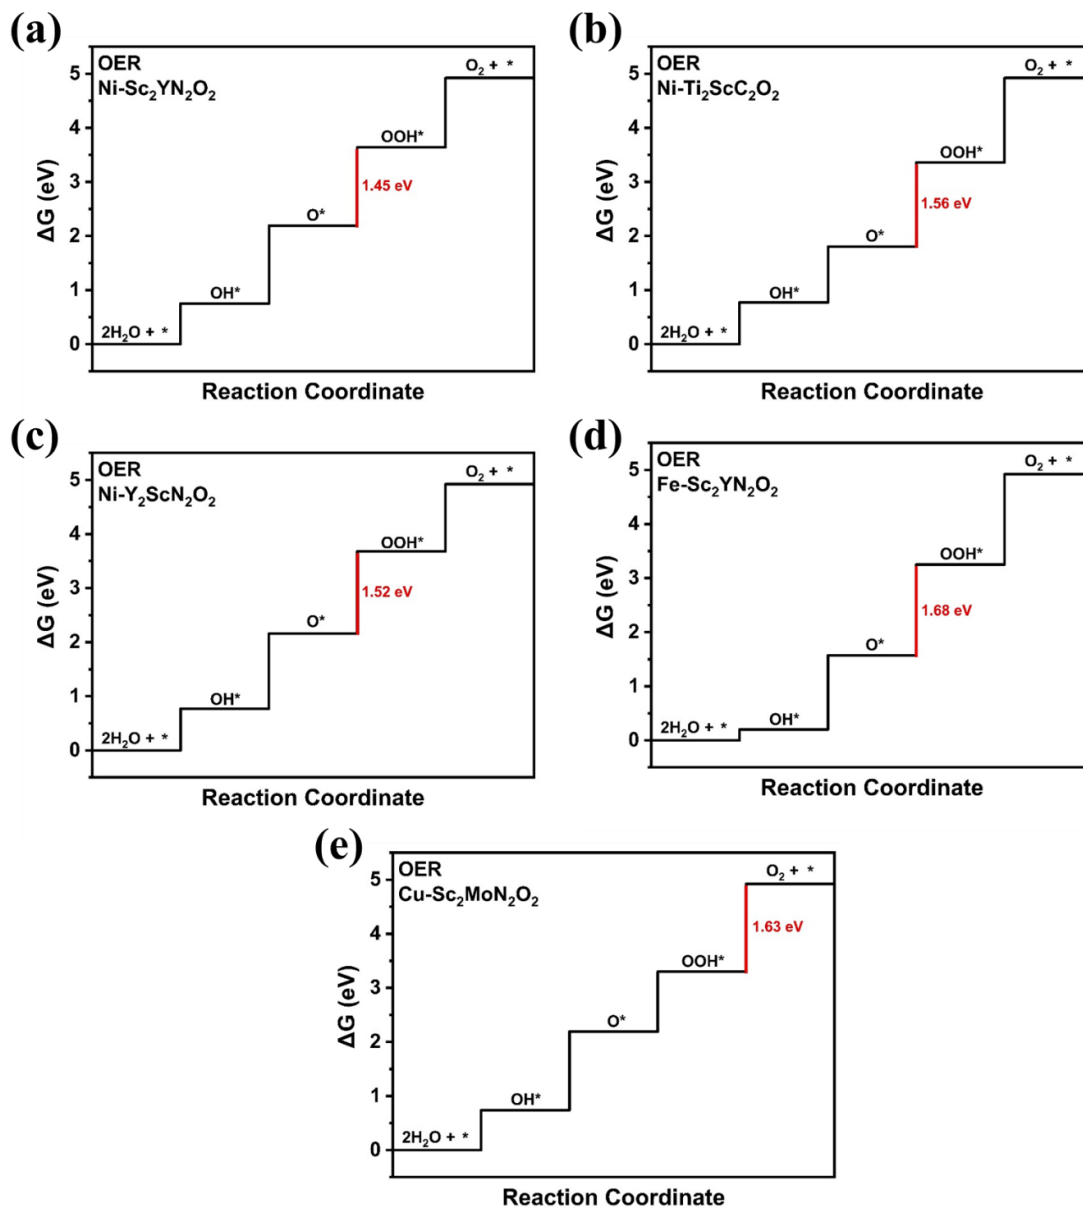

**Fig. S1** Free energy diagrams of good OER catalysts **a)** Ni-Sc<sub>2</sub>YN<sub>2</sub>O<sub>2</sub>, **b)** Ni-Ti<sub>2</sub>ScC<sub>2</sub>O<sub>2</sub>, **c)** Ni-Y<sub>2</sub>ScN<sub>2</sub>O<sub>2</sub>, **d)** Fe-Sc<sub>2</sub>YN<sub>2</sub>O<sub>2</sub>, and **e)** Cu-Sc<sub>2</sub>MoN<sub>2</sub>O<sub>2</sub> at standard conditions. The red colored line indicates the rate-determining step for each efficient OER catalysts.

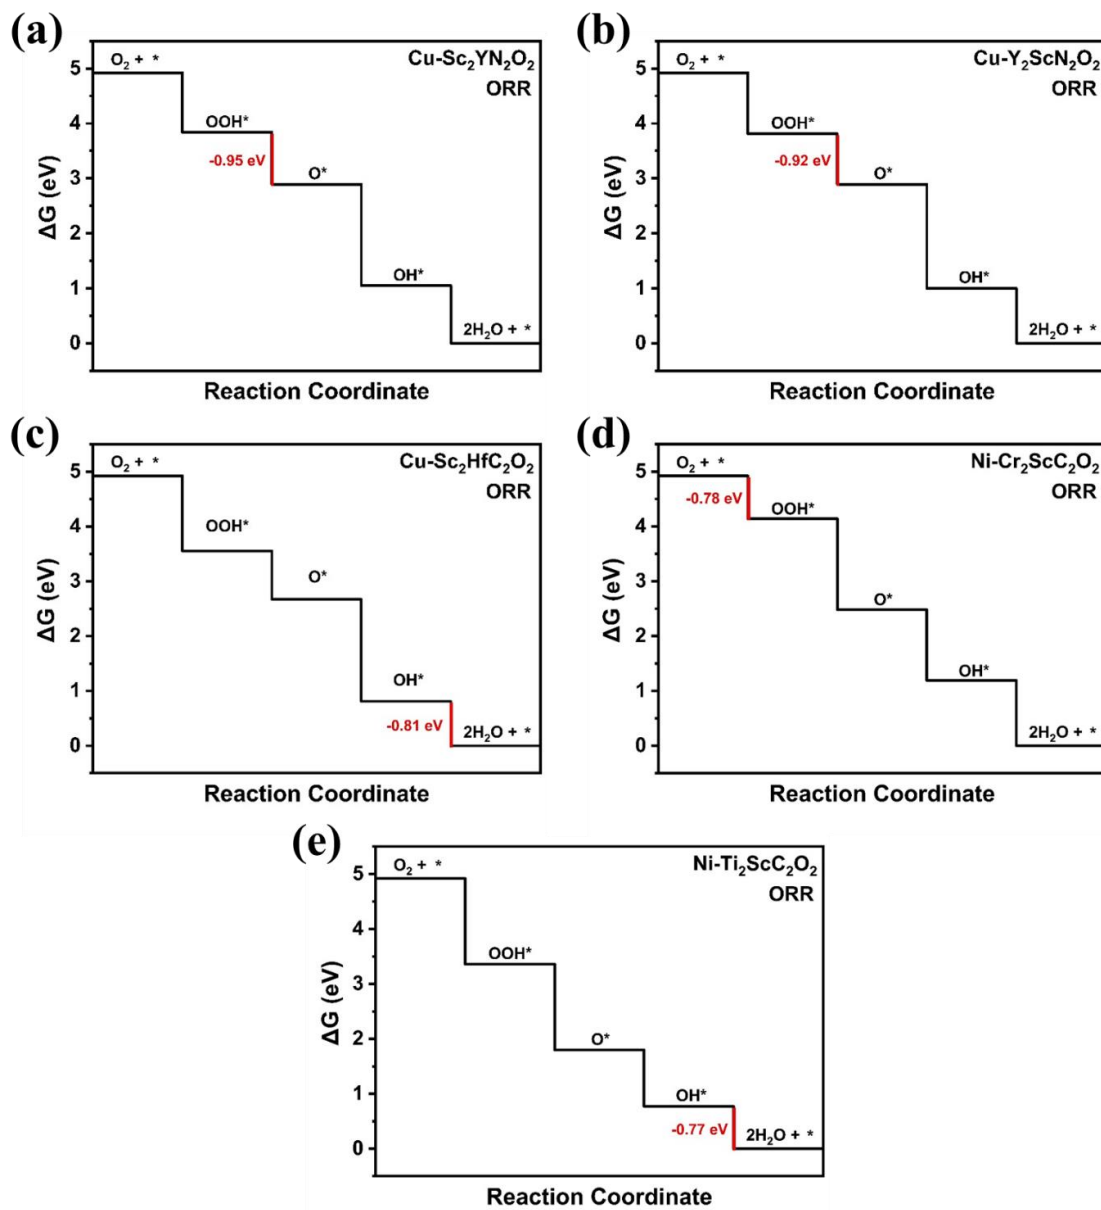

**Fig. S2** Free energy diagrams of good ORR catalysts: **a)** Cu-Sc<sub>2</sub>YN<sub>2</sub>O<sub>2</sub>, **b)** Cu-Y<sub>2</sub>ScN<sub>2</sub>O<sub>2</sub>, **c)** Cu-Sc<sub>2</sub>HfC<sub>2</sub>O<sub>2</sub>, **d)** Ni-Cr<sub>2</sub>ScC<sub>2</sub>O<sub>2</sub>, and **e)** Ni-Ti<sub>2</sub>ScC<sub>2</sub>O<sub>2</sub> at standard conditions. The red colored line indicates the rate-determining step for each efficient ORR catalysts.

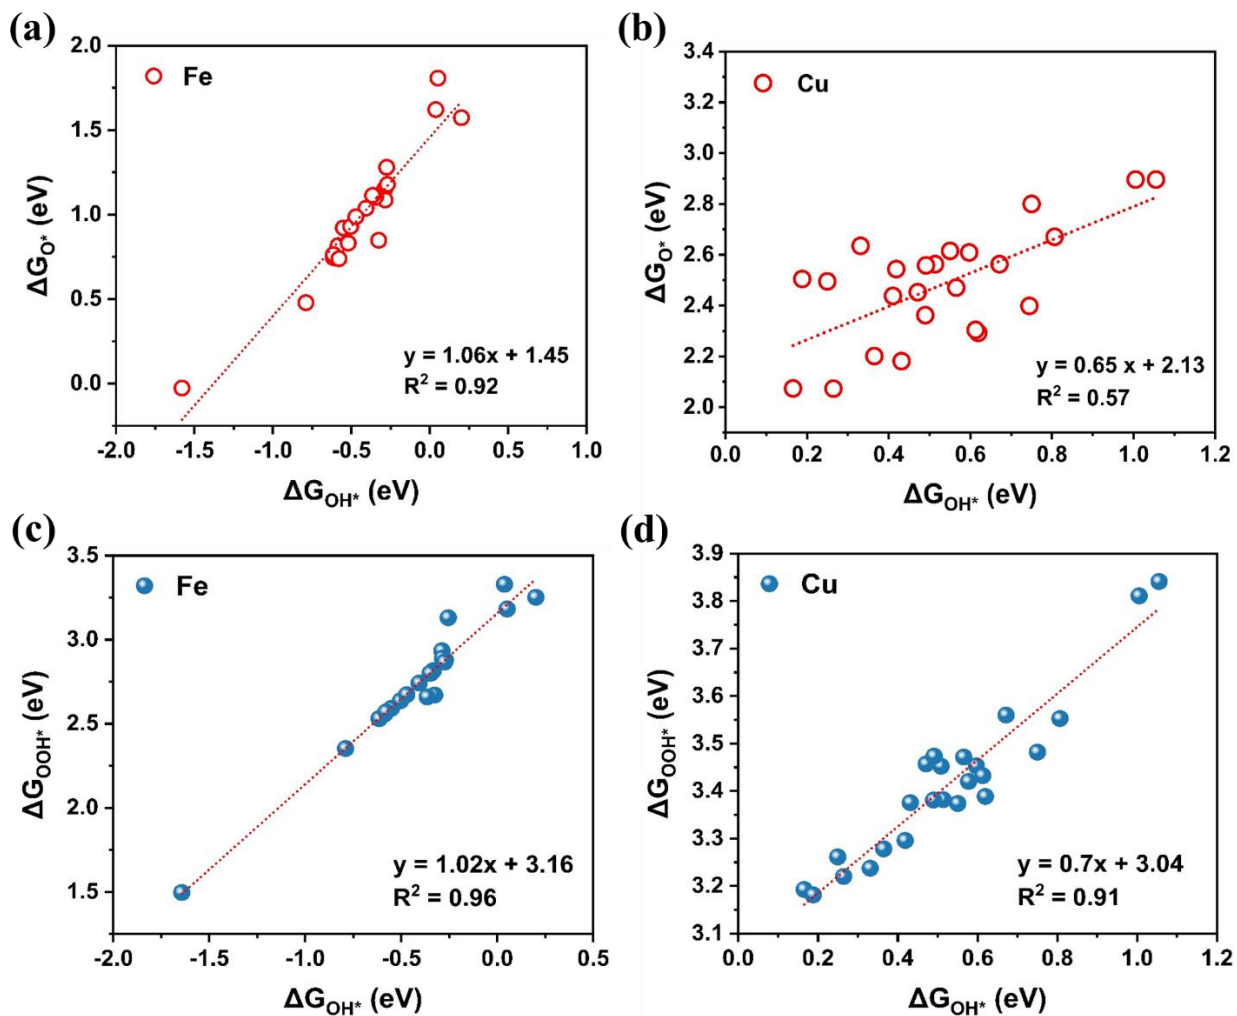

**Fig. S3** The linear relationship between  $\Delta G_{O^*}$  and  $\Delta G_{OH^*}$  for **a)** Fe-doped, **b)** Cu-doped MXenes. The linear relationship between  $\Delta G_{OOH^*}$  and  $\Delta G_{OH^*}$  for **c)** Fe-doped, and **d)** Cu-doped MXenes.

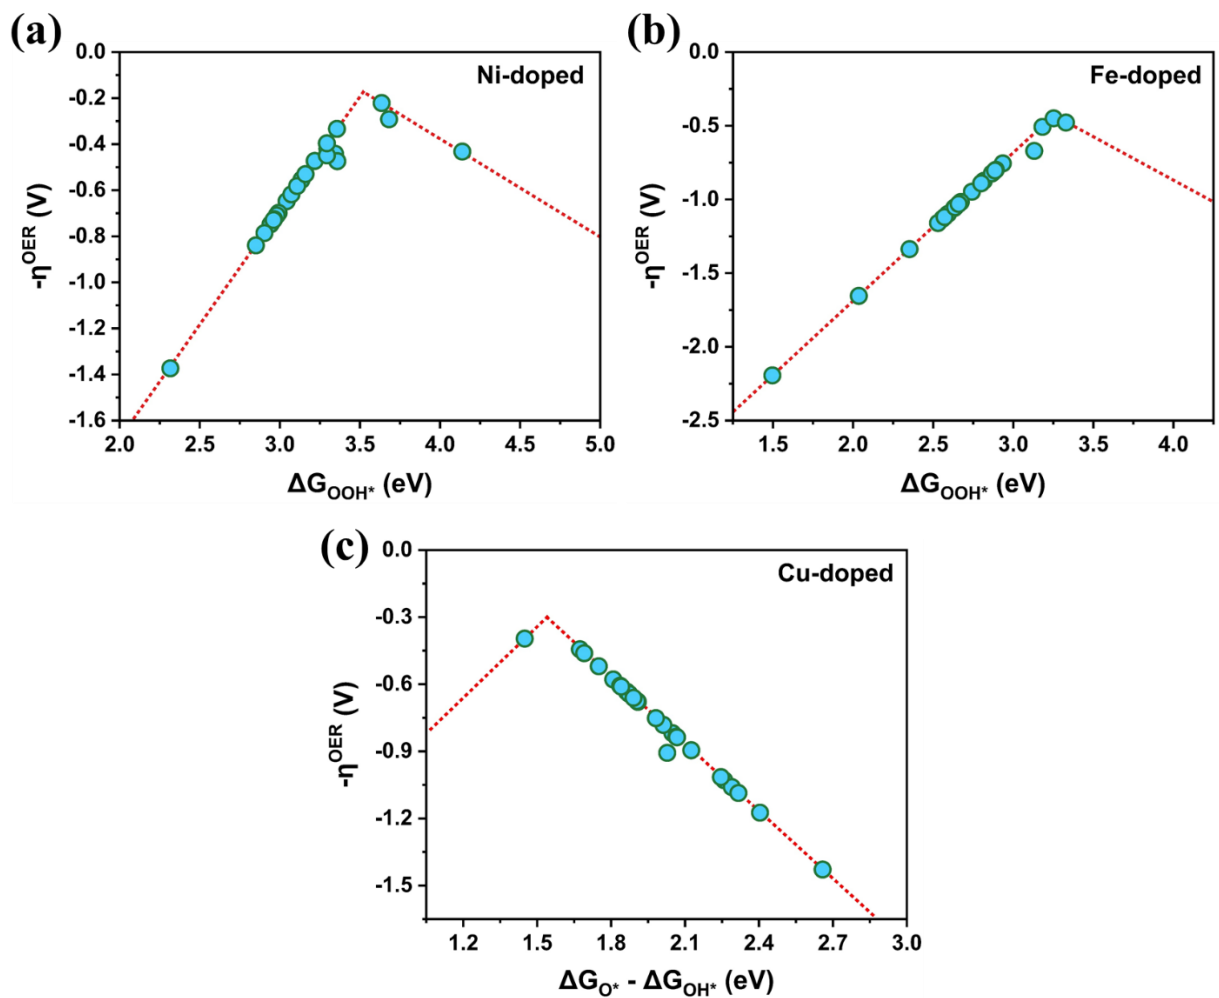

**Fig. S4** Volcano plot for **a)** Ni-doped, **b)** Fe-doped, and **c)** Cu-doped MXenes between negative of OER overpotential ( $-\eta^{\text{OER}}$ ) and  $\Delta G_{\text{OOH}^*}$  for Ni and Fe, and  $\Delta G_{\text{O}^*} - \Delta G_{\text{OH}^*}$  for Cu doped MXenes.



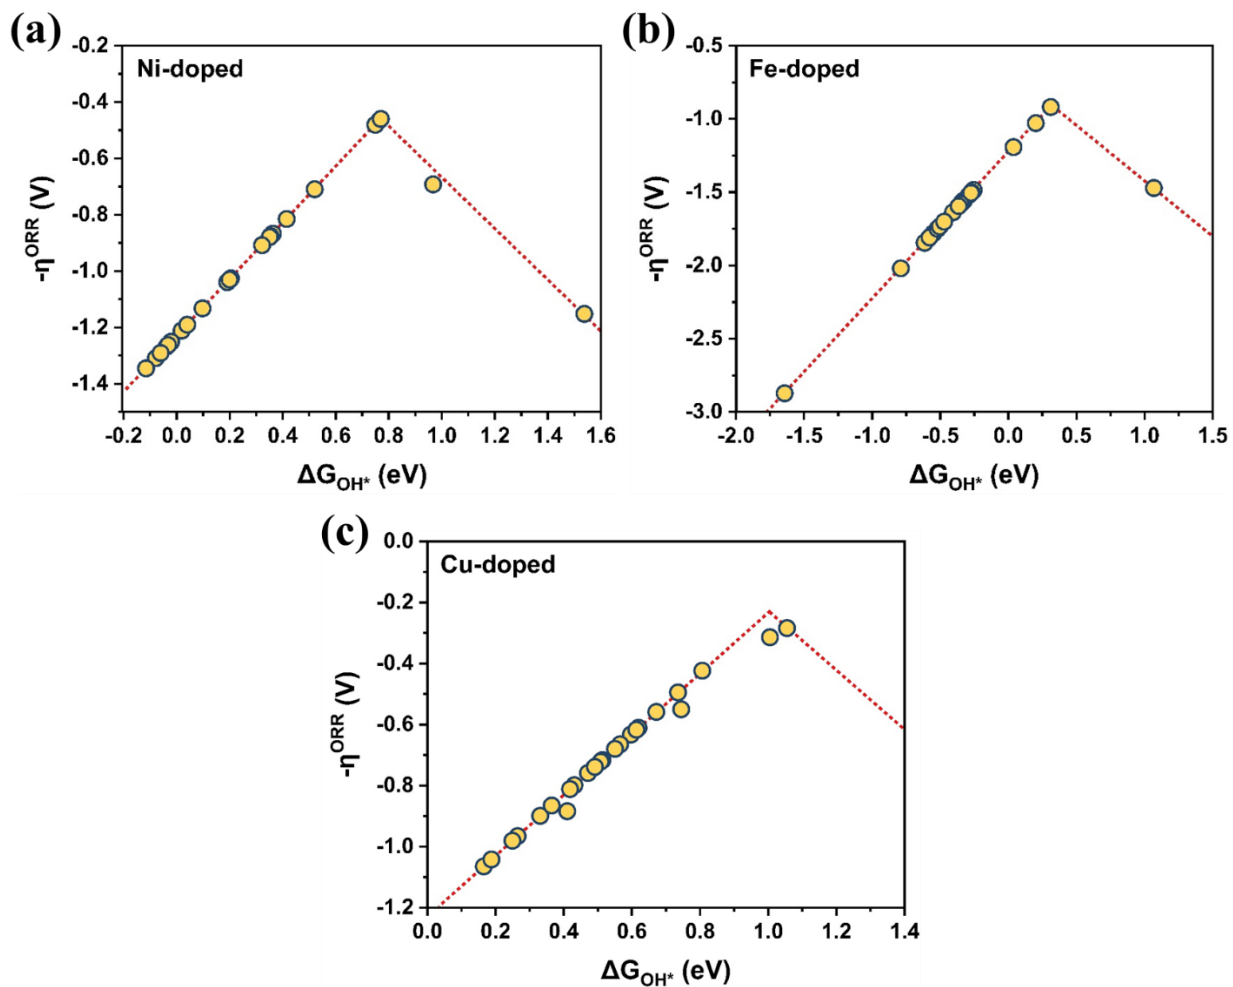

**Fig. S5** Volcano plot for a) Ni-doped, b) Fe-doped, and c) Cu-doped MXenes between the negative value of ORR overpotential ( $-\eta^{\text{ORR}}$ ) and  $\Delta G_{\text{OH}^*}$ .

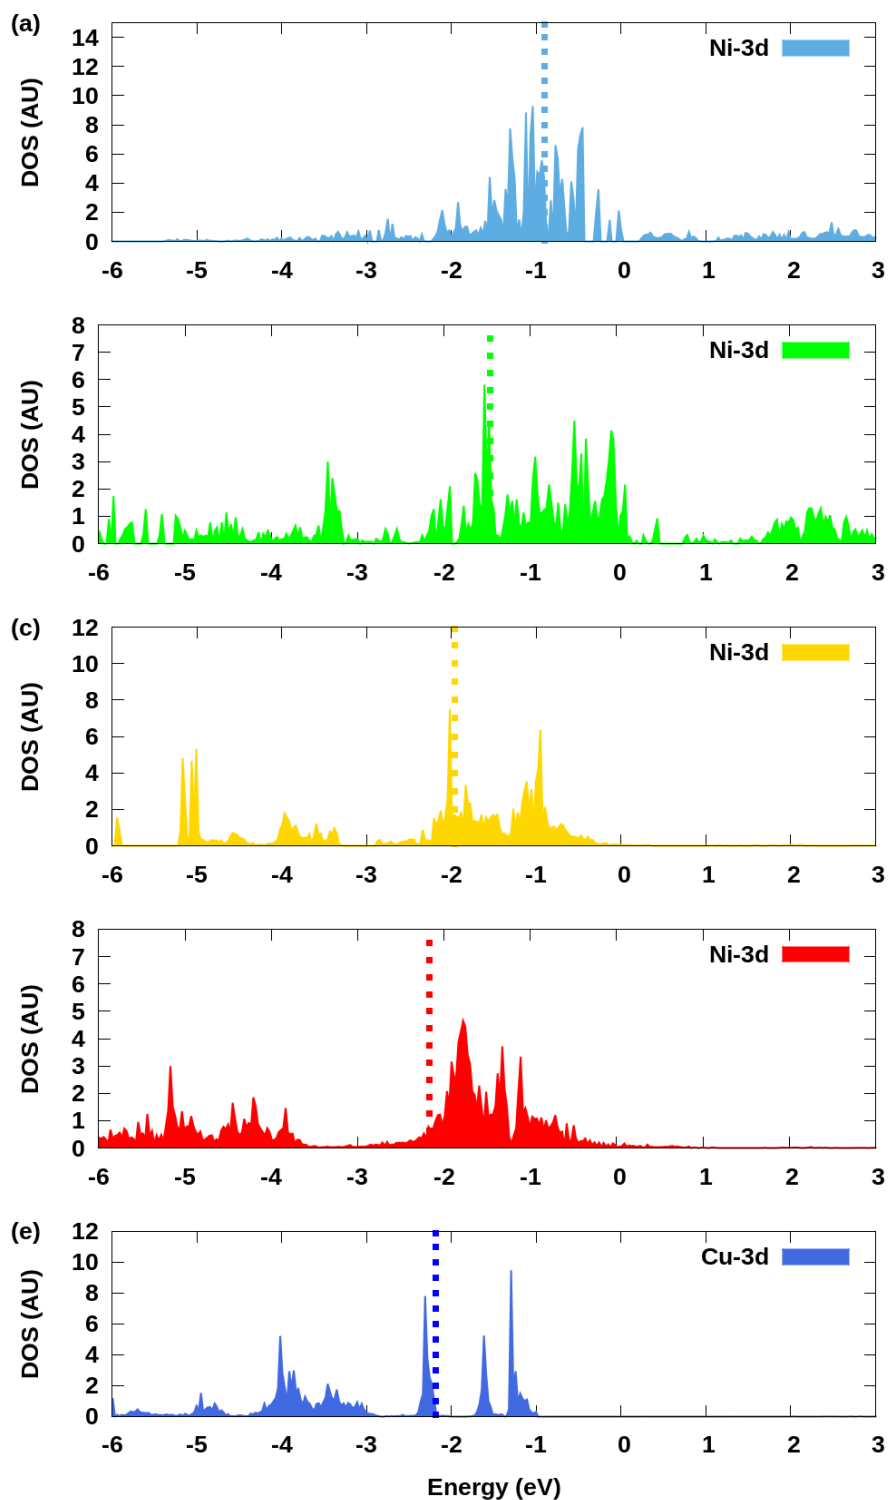

**Fig. S6** The 3d states PDOS and respective d-band center (dashed lines) of doped single atom for **a)** Ni-Sc<sub>2</sub>YN<sub>2</sub>O<sub>2</sub>, **b)** Ni-Y<sub>2</sub>ScN<sub>2</sub>O<sub>2</sub>, **c)** Ni-Ti<sub>2</sub>ScC<sub>2</sub>O<sub>2</sub>, **d)** Ni-Cr<sub>2</sub>ScC<sub>2</sub>O<sub>2</sub>, and **e)** Cu-Sc<sub>2</sub>MoN<sub>2</sub>O<sub>2</sub>. The Fermi level is set to zero.

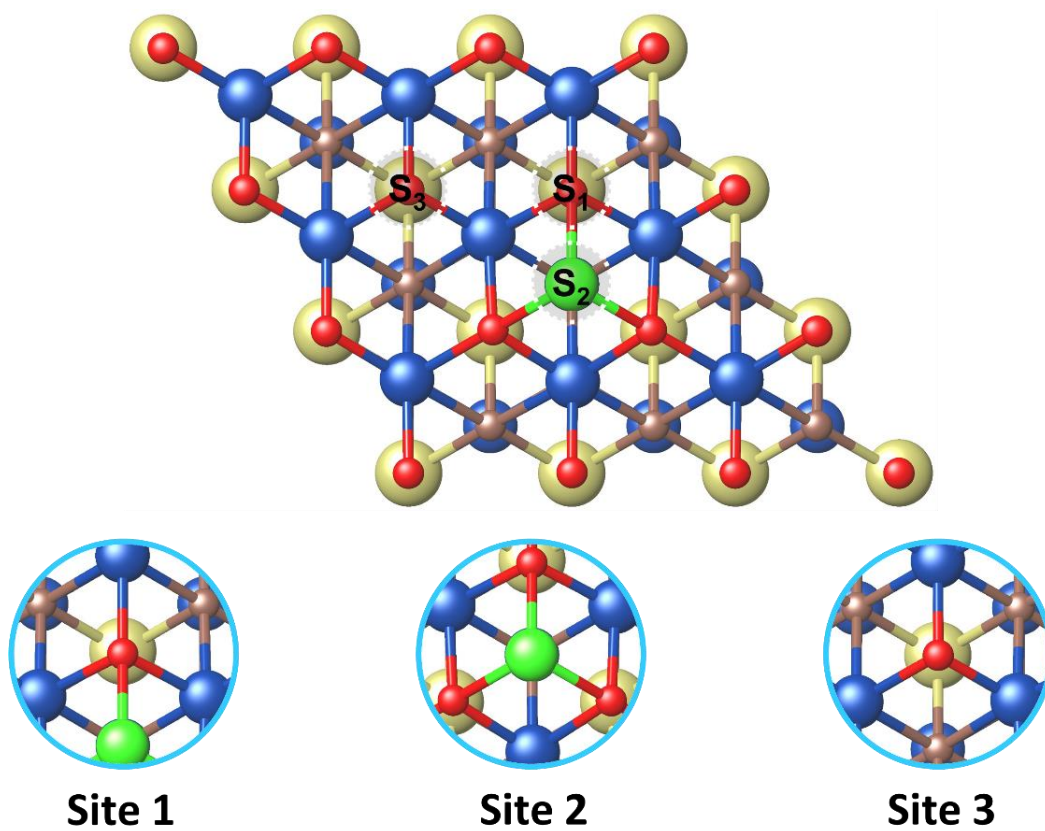

**Fig. S7** Schematic top view with three different sites for H-adsorption (S<sub>1</sub>, S<sub>2</sub>, and S<sub>3</sub>) for MXenes.

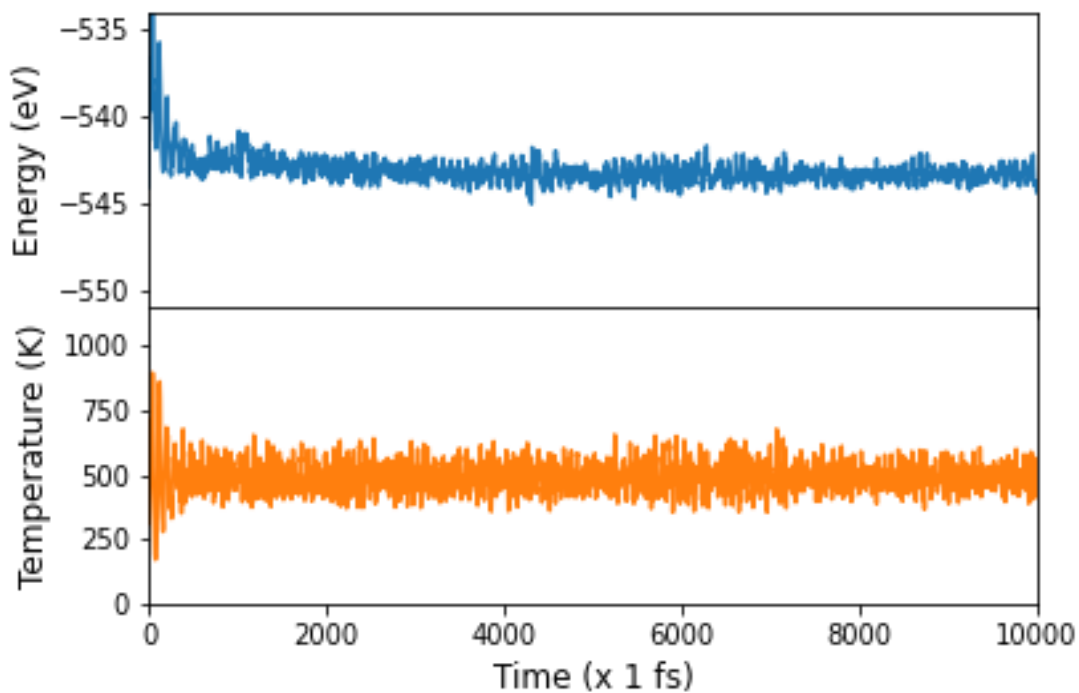

**Fig. S8** The energy and temperature changes along time in MD simulation for Ni-Cr<sub>2</sub>ScC<sub>2</sub>O<sub>2</sub>. The machine-learned potential are generated using on-the-fly sampling and sparse Gaussian regression (SGPR) algorithm as implemented in AUTOFORCE. The MD simulations are conducted at T=500K.

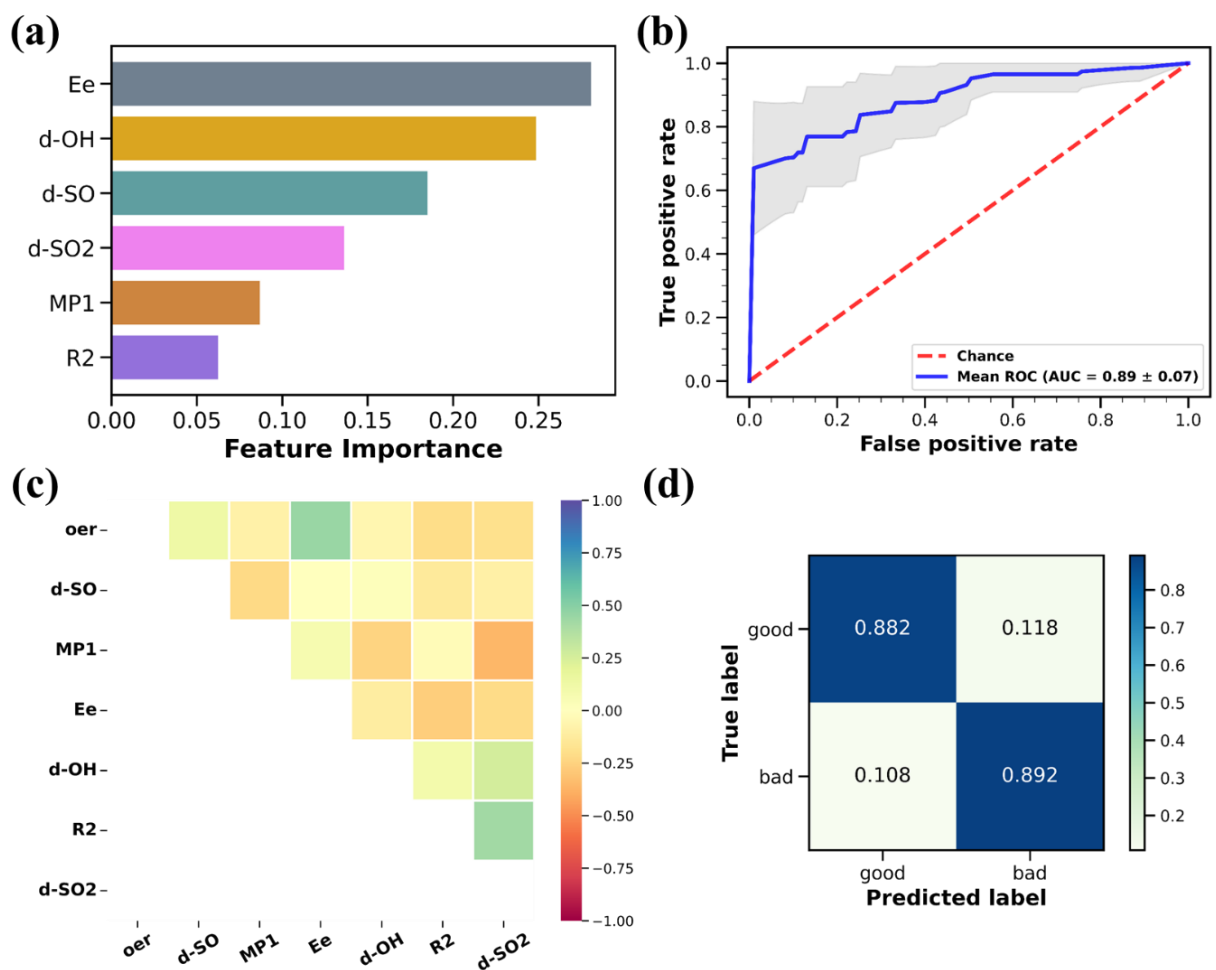

**Fig. S9** Machine learning prediction of best explored classifier for OER activity on MXene combinations. **a)** Feature importance of reduced features. **b)** Mean ROC-AUC curve for Bagging classifier, the high AUC indicates the capability to distinguish between classes. **c)** Pearson feature-feature and feature-target correlation map. **d)** Normalized confusion matrix showing the great prediction level.

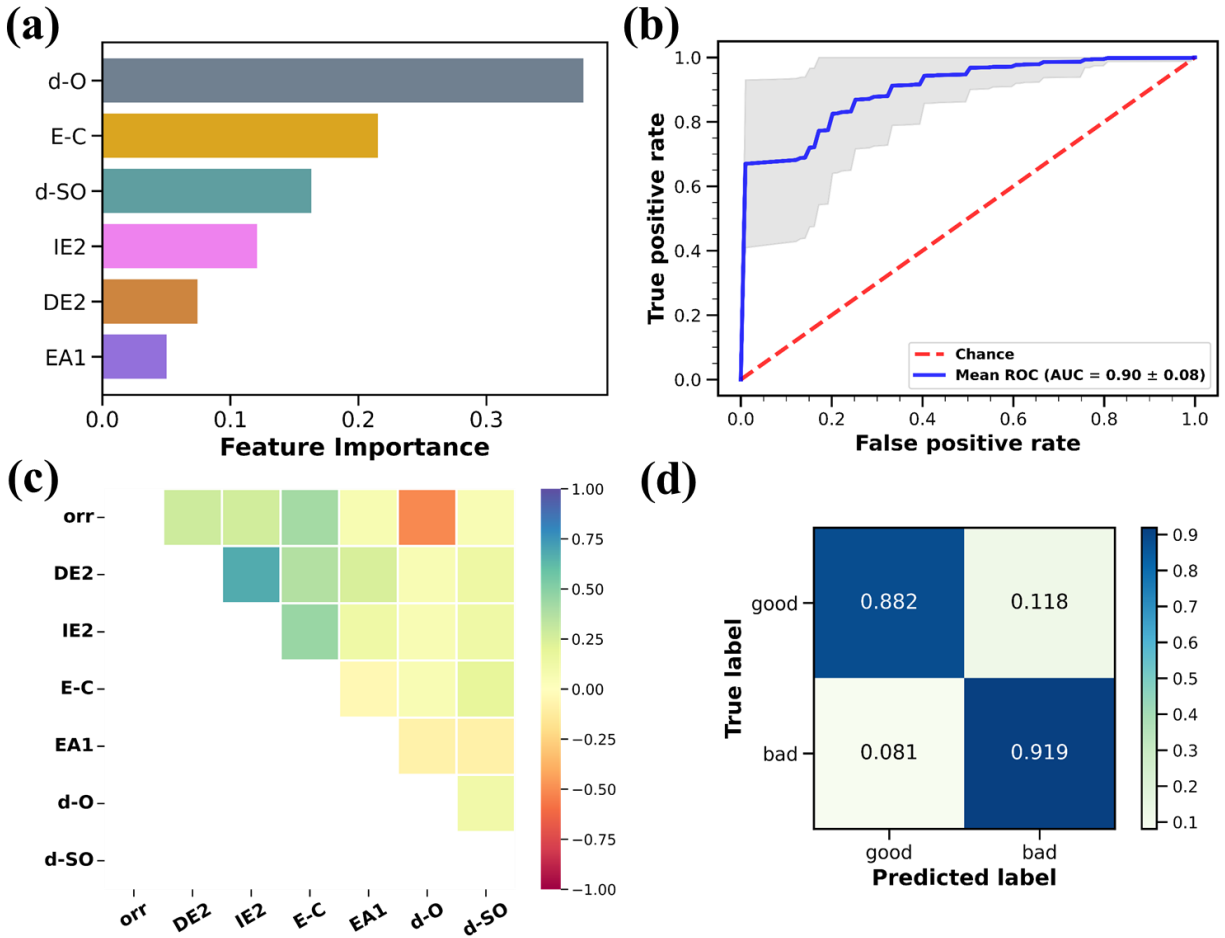

**Fig. S10** Machine learning prediction of best explored classifier for ORR activity on MXene combinations. **a)** Feature importance of reduced features. **b)** Mean ROC-AUC curve for Random Forest classifier, the high AUC indicates the capability to distinguish between classes. **c)** Pearson feature-feature and feature-target correlation map. **d)** Normalized confusion matrix showing the great prediction level.

**Supplementary Tables:**

**Table S1** Embedding energies ( $E_e$  in eV) for O-terminated MXenes with anchored TM atom (Ni/Fe/Cu) for all screened MXene combinations.

| <b>Anchored Metal</b> | <b>MXenes</b>                        | <b><math>E_e</math></b> | <b>MXenes</b>                        | <b><math>E_e</math></b> | <b>MXenes</b>                        | <b><math>E_e</math></b> |
|-----------------------|--------------------------------------|-------------------------|--------------------------------------|-------------------------|--------------------------------------|-------------------------|
| <b>Ni</b>             | <b>Sc<sub>2</sub>CrC<sub>2</sub></b> | -4.10                   | <b>Cr<sub>2</sub>MoC<sub>2</sub></b> | -4.64                   | <b>Sc<sub>2</sub>WN<sub>2</sub></b>  | -3.49                   |
|                       | <b>Sc<sub>2</sub>HfC<sub>2</sub></b> | -4.64                   | <b>Cr<sub>2</sub>WC<sub>2</sub></b>  | -4.62                   | <b>V<sub>2</sub>CrN<sub>2</sub></b>  | -3.94                   |
|                       | <b>Ti<sub>2</sub>ScC<sub>2</sub></b> | -5.08                   | <b>Y<sub>2</sub>NbC<sub>2</sub></b>  | -4.46                   | <b>Cr<sub>2</sub>VN<sub>2</sub></b>  | -4.31                   |
|                       | <b>V<sub>2</sub>ScC<sub>2</sub></b>  | -4.61                   | <b>Zr<sub>2</sub>ScC<sub>2</sub></b> | -4.34                   | <b>Cr<sub>2</sub>NbN<sub>2</sub></b> | -4.59                   |
|                       | <b>V<sub>2</sub>MoC<sub>2</sub></b>  | -4.20                   | <b>Hf<sub>2</sub>ScC<sub>2</sub></b> | -4.17                   | <b>Cr<sub>2</sub>HfN<sub>2</sub></b> | -4.19                   |
|                       | <b>V<sub>2</sub>TaC<sub>2</sub></b>  | -4.38                   | <b>Sc<sub>2</sub>TiN<sub>2</sub></b> | -3.67                   | <b>Y<sub>2</sub>ScN<sub>2</sub></b>  | -5.81                   |
|                       | <b>V<sub>2</sub>WC<sub>2</sub></b>   | -4.14                   | <b>Sc<sub>2</sub>VN<sub>2</sub></b>  | -4.37                   | <b>Mo<sub>2</sub>TaN<sub>2</sub></b> | -3.89                   |
|                       | <b>Cr<sub>2</sub>ScC<sub>2</sub></b> | -5.69                   | <b>Sc<sub>2</sub>YN<sub>2</sub></b>  | -6.21                   |                                      |                         |
|                       | <b>Cr<sub>2</sub>VC<sub>2</sub></b>  | -4.61                   | <b>Sc<sub>2</sub>MoN<sub>2</sub></b> | -4.51                   |                                      |                         |
|                       | <b>Cr<sub>2</sub>NbC<sub>2</sub></b> | -4.80                   | <b>Sc<sub>2</sub>TaN<sub>2</sub></b> | -3.51                   |                                      |                         |
| <b>Fe</b>             | <b>Sc<sub>2</sub>CrC<sub>2</sub></b> | -4.13                   | <b>Cr<sub>2</sub>MoC<sub>2</sub></b> | -4.86                   | <b>Sc<sub>2</sub>WN<sub>2</sub></b>  | -3.79                   |
|                       | <b>Sc<sub>2</sub>HfC<sub>2</sub></b> | -4.91                   | <b>Cr<sub>2</sub>WC<sub>2</sub></b>  | -4.84                   | <b>V<sub>2</sub>CrN<sub>2</sub></b>  | -3.97                   |
|                       | <b>Ti<sub>2</sub>ScC<sub>2</sub></b> | -4.02                   | <b>Y<sub>2</sub>NbC<sub>2</sub></b>  | -4.51                   | <b>Cr<sub>2</sub>VN<sub>2</sub></b>  | -4.01                   |
|                       | <b>V<sub>2</sub>ScC<sub>2</sub></b>  | -4.57                   | <b>Zr<sub>2</sub>ScC<sub>2</sub></b> | -4.35                   | <b>Cr<sub>2</sub>NbN<sub>2</sub></b> | -4.71                   |
|                       | <b>V<sub>2</sub>MoC<sub>2</sub></b>  | -4.08                   | <b>Hf<sub>2</sub>ScC<sub>2</sub></b> | -4.94                   | <b>Cr<sub>2</sub>HfN<sub>2</sub></b> | -4.20                   |
|                       | <b>V<sub>2</sub>TaC<sub>2</sub></b>  | -4.44                   | <b>Sc<sub>2</sub>TiN<sub>2</sub></b> | -4.25                   | <b>Y<sub>2</sub>ScN<sub>2</sub></b>  | -6.29                   |
|                       | <b>V<sub>2</sub>WC<sub>2</sub></b>   | -4.30                   | <b>Sc<sub>2</sub>VN<sub>2</sub></b>  | -4.81                   | <b>Mo<sub>2</sub>TaN<sub>2</sub></b> | -4.37                   |
|                       | <b>Cr<sub>2</sub>ScC<sub>2</sub></b> | -6.05                   | <b>Sc<sub>2</sub>YN<sub>2</sub></b>  | -6.85                   |                                      |                         |
|                       | <b>Cr<sub>2</sub>VC<sub>2</sub></b>  | -4.63                   | <b>Sc<sub>2</sub>MoN<sub>2</sub></b> | -4.58                   |                                      |                         |
|                       | <b>Cr<sub>2</sub>NbC<sub>2</sub></b> | -4.97                   | <b>Sc<sub>2</sub>TaN<sub>2</sub></b> | -4.18                   |                                      |                         |
| <b>Cu</b>             | <b>Sc<sub>2</sub>CrC<sub>2</sub></b> | -3.29                   | <b>Cr<sub>2</sub>MoC<sub>2</sub></b> | -2.92                   | <b>Sc<sub>2</sub>WN<sub>2</sub></b>  | -2.12                   |
|                       | <b>Sc<sub>2</sub>HfC<sub>2</sub></b> | -3.08                   | <b>Cr<sub>2</sub>WC<sub>2</sub></b>  | -2.93                   | <b>V<sub>2</sub>CrN<sub>2</sub></b>  | -2.41                   |
|                       | <b>Ti<sub>2</sub>ScC<sub>2</sub></b> | -2.92                   | <b>Y<sub>2</sub>NbC<sub>2</sub></b>  | -2.82                   | <b>Cr<sub>2</sub>VN<sub>2</sub></b>  | -2.68                   |
|                       | <b>V<sub>2</sub>ScC<sub>2</sub></b>  | -2.57                   | <b>Zr<sub>2</sub>ScC<sub>2</sub></b> | -2.61                   | <b>Cr<sub>2</sub>NbN<sub>2</sub></b> | -3.04                   |
|                       | <b>V<sub>2</sub>MoC<sub>2</sub></b>  | -2.26                   | <b>Hf<sub>2</sub>ScC<sub>2</sub></b> | -2.90                   | <b>Cr<sub>2</sub>HfN<sub>2</sub></b> | -2.66                   |
|                       | <b>V<sub>2</sub>TaC<sub>2</sub></b>  | -2.54                   | <b>Sc<sub>2</sub>TiN<sub>2</sub></b> | -2.33                   | <b>Y<sub>2</sub>ScN<sub>2</sub></b>  | -3.69                   |
|                       | <b>V<sub>2</sub>WC<sub>2</sub></b>   | -2.21                   | <b>Sc<sub>2</sub>VN<sub>2</sub></b>  | -3.00                   | <b>Mo<sub>2</sub>TaN<sub>2</sub></b> | -2.95                   |
|                       | <b>Cr<sub>2</sub>ScC<sub>2</sub></b> | -3.48                   | <b>Sc<sub>2</sub>YN<sub>2</sub></b>  | -4.01                   |                                      |                         |
|                       | <b>Cr<sub>2</sub>VC<sub>2</sub></b>  | -2.90                   | <b>Sc<sub>2</sub>MoN<sub>2</sub></b> | -3.43                   |                                      |                         |
|                       | <b>Cr<sub>2</sub>NbC<sub>2</sub></b> | -2.71                   | <b>Sc<sub>2</sub>TaN<sub>2</sub></b> | -2.25                   |                                      |                         |

**Table S2**  $E_{e-c} = E_e - E_c$  (difference between embedding and cohesive energy in eV) for O-terminated MXene combinations with an anchored TM atom of Ni/Fe/Cu.

| <b>Anchored Metal</b> | <b>MXenes</b>                        | <b><math>E_{e-c}</math></b> | <b>MXenes</b>                        | <b><math>E_{e-c}</math></b> | <b>MXenes</b>                        | <b><math>E_{e-c}</math></b> |
|-----------------------|--------------------------------------|-----------------------------|--------------------------------------|-----------------------------|--------------------------------------|-----------------------------|
| <b>Ni</b>             | <b>Sc<sub>2</sub>CrC<sub>2</sub></b> | 1.08                        | <b>Cr<sub>2</sub>MoC<sub>2</sub></b> | 0.54                        | <b>Sc<sub>2</sub>WN<sub>2</sub></b>  | 1.69                        |
|                       | <b>Sc<sub>2</sub>HfC<sub>2</sub></b> | 0.54                        | <b>Cr<sub>2</sub>WC<sub>2</sub></b>  | 0.56                        | <b>V<sub>2</sub>CrN<sub>2</sub></b>  | 1.24                        |
|                       | <b>Ti<sub>2</sub>ScC<sub>2</sub></b> | 0.10                        | <b>Y<sub>2</sub>NbC<sub>2</sub></b>  | 0.72                        | <b>Cr<sub>2</sub>VN<sub>2</sub></b>  | 0.87                        |
|                       | <b>V<sub>2</sub>ScC<sub>2</sub></b>  | 0.57                        | <b>Zr<sub>2</sub>ScC<sub>2</sub></b> | 0.84                        | <b>Cr<sub>2</sub>NbN<sub>2</sub></b> | 0.59                        |
|                       | <b>V<sub>2</sub>MoC<sub>2</sub></b>  | 0.98                        | <b>Hf<sub>2</sub>ScC<sub>2</sub></b> | 1.01                        | <b>Cr<sub>2</sub>HfN<sub>2</sub></b> | 0.99                        |
|                       | <b>V<sub>2</sub>TaC<sub>2</sub></b>  | 0.80                        | <b>Sc<sub>2</sub>TiN<sub>2</sub></b> | 1.51                        | <b>Y<sub>2</sub>ScN<sub>2</sub></b>  | -0.63                       |
|                       | <b>V<sub>2</sub>WC<sub>2</sub></b>   | 1.04                        | <b>Sc<sub>2</sub>VN<sub>2</sub></b>  | 0.81                        | <b>Mo<sub>2</sub>TaN<sub>2</sub></b> | 1.29                        |
|                       | <b>Cr<sub>2</sub>ScC<sub>2</sub></b> | -0.51                       | <b>Sc<sub>2</sub>YN<sub>2</sub></b>  | -1.03                       |                                      |                             |
|                       | <b>Cr<sub>2</sub>VC<sub>2</sub></b>  | 0.57                        | <b>Sc<sub>2</sub>MoN<sub>2</sub></b> | 0.67                        |                                      |                             |
|                       | <b>Cr<sub>2</sub>NbC<sub>2</sub></b> | 0.38                        | <b>Sc<sub>2</sub>TaN<sub>2</sub></b> | 1.67                        |                                      |                             |
| <b>Fe</b>             | <b>Sc<sub>2</sub>CrC<sub>2</sub></b> | 1.14                        | <b>Cr<sub>2</sub>MoC<sub>2</sub></b> | 0.41                        | <b>Sc<sub>2</sub>WN<sub>2</sub></b>  | 1.48                        |
|                       | <b>Sc<sub>2</sub>HfC<sub>2</sub></b> | 0.36                        | <b>Cr<sub>2</sub>WC<sub>2</sub></b>  | 0.43                        | <b>V<sub>2</sub>CrN<sub>2</sub></b>  | 1.30                        |
|                       | <b>Ti<sub>2</sub>ScC<sub>2</sub></b> | 1.25                        | <b>Y<sub>2</sub>NbC<sub>2</sub></b>  | 0.76                        | <b>Cr<sub>2</sub>VN<sub>2</sub></b>  | 1.26                        |
|                       | <b>V<sub>2</sub>ScC<sub>2</sub></b>  | 0.70                        | <b>Zr<sub>2</sub>ScC<sub>2</sub></b> | 0.92                        | <b>Cr<sub>2</sub>NbN<sub>2</sub></b> | 0.56                        |
|                       | <b>V<sub>2</sub>MoC<sub>2</sub></b>  | 1.19                        | <b>Hf<sub>2</sub>ScC<sub>2</sub></b> | 0.33                        | <b>Cr<sub>2</sub>HfN<sub>2</sub></b> | 1.07                        |
|                       | <b>V<sub>2</sub>TaC<sub>2</sub></b>  | 0.83                        | <b>Sc<sub>2</sub>TiN<sub>2</sub></b> | 1.02                        | <b>Y<sub>2</sub>ScN<sub>2</sub></b>  | -1.02                       |
|                       | <b>V<sub>2</sub>WC<sub>2</sub></b>   | 0.97                        | <b>Sc<sub>2</sub>VN<sub>2</sub></b>  | 0.76                        | <b>Mo<sub>2</sub>TaN<sub>2</sub></b> | 0.90                        |
|                       | <b>Cr<sub>2</sub>ScC<sub>2</sub></b> | -0.78                       | <b>Sc<sub>2</sub>YN<sub>2</sub></b>  | -1.58                       |                                      |                             |
|                       | <b>Cr<sub>2</sub>VC<sub>2</sub></b>  | 0.64                        | <b>Sc<sub>2</sub>MoN<sub>2</sub></b> | 0.69                        |                                      |                             |
|                       | <b>Cr<sub>2</sub>NbC<sub>2</sub></b> | 0.30                        | <b>Sc<sub>2</sub>TaN<sub>2</sub></b> | 1.09                        |                                      |                             |
| <b>Cu</b>             | <b>Sc<sub>2</sub>CrC<sub>2</sub></b> | 0.19                        | <b>Cr<sub>2</sub>MoC<sub>2</sub></b> | 0.56                        | <b>Sc<sub>2</sub>WN<sub>2</sub></b>  | 1.36                        |
|                       | <b>Sc<sub>2</sub>HfC<sub>2</sub></b> | 0.40                        | <b>Cr<sub>2</sub>WC<sub>2</sub></b>  | 0.55                        | <b>V<sub>2</sub>CrN<sub>2</sub></b>  | 1.07                        |
|                       | <b>Ti<sub>2</sub>ScC<sub>2</sub></b> | 0.56                        | <b>Y<sub>2</sub>NbC<sub>2</sub></b>  | 0.66                        | <b>Cr<sub>2</sub>VN<sub>2</sub></b>  | 0.80                        |
|                       | <b>V<sub>2</sub>ScC<sub>2</sub></b>  | 0.91                        | <b>Zr<sub>2</sub>ScC<sub>2</sub></b> | 0.87                        | <b>Cr<sub>2</sub>NbN<sub>2</sub></b> | 0.44                        |
|                       | <b>V<sub>2</sub>MoC<sub>2</sub></b>  | 1.22                        | <b>Hf<sub>2</sub>ScC<sub>2</sub></b> | 0.58                        | <b>Cr<sub>2</sub>HfN<sub>2</sub></b> | 0.82                        |
|                       | <b>V<sub>2</sub>TaC<sub>2</sub></b>  | 0.94                        | <b>Sc<sub>2</sub>TiN<sub>2</sub></b> | 1.15                        | <b>Y<sub>2</sub>ScN<sub>2</sub></b>  | -0.21                       |
|                       | <b>V<sub>2</sub>WC<sub>2</sub></b>   | 1.27                        | <b>Sc<sub>2</sub>VN<sub>2</sub></b>  | 0.48                        | <b>Mo<sub>2</sub>TaN<sub>2</sub></b> | 0.53                        |
|                       | <b>Cr<sub>2</sub>ScC<sub>2</sub></b> | 0.004                       | <b>Sc<sub>2</sub>YN<sub>2</sub></b>  | -0.53                       |                                      |                             |
|                       | <b>Cr<sub>2</sub>VC<sub>2</sub></b>  | 0.58                        | <b>Sc<sub>2</sub>MoN<sub>2</sub></b> | 0.05                        |                                      |                             |
|                       | <b>Cr<sub>2</sub>NbC<sub>2</sub></b> | 0.77                        | <b>Sc<sub>2</sub>TaN<sub>2</sub></b> | 1.23                        |                                      |                             |



**Table S3** Adsorption free energies ( $\Delta G$  in eV) of intermediates (OH\*, O\*, and OOH\*) for screened  $M_2M'X_2O_2$  type MXenes.

| MXenes                           | Ni                |                  |                    | Fe                |                  |                    | Cu                |                  |                    |
|----------------------------------|-------------------|------------------|--------------------|-------------------|------------------|--------------------|-------------------|------------------|--------------------|
|                                  | $\Delta G_{OH^*}$ | $\Delta G_{O^*}$ | $\Delta G_{OOH^*}$ | $\Delta G_{OH^*}$ | $\Delta G_{O^*}$ | $\Delta G_{OOH^*}$ | $\Delta G_{OH^*}$ | $\Delta G_{O^*}$ | $\Delta G_{OOH^*}$ |
| Sc <sub>2</sub> CrC <sub>2</sub> | -0.04             | 1.24             | 2.94               | -0.59             | 0.82             | 2.56               | 0.62              | 2.29             | 3.39               |
| Sc <sub>2</sub> HfC <sub>2</sub> | 0.20              | 1.43             | 3.04               | -0.26             | 1.65             | 3.13               | 0.81              | 2.67             | 3.55               |
| Ti <sub>2</sub> ScC <sub>2</sub> | 0.77              | 1.79             | 3.36               | -1.64             | -0.03            | 1.50               | 0.75              | 3.01             | 3.48               |
| V <sub>2</sub> ScC <sub>2</sub>  | 0.52              | 1.85             | 3.50               | -0.29             | 1.15             | 2.93               | 0.33              | 2.74             | 3.24               |
| V <sub>2</sub> MoC <sub>2</sub>  | 0.32              | 1.65             | 3.30               | -0.33             | 0.85             | 2.67               | 0.26              | 2.07             | 3.22               |
| V <sub>2</sub> TaC <sub>2</sub>  | 0.36              | 1.67             | 3.34               | -0.33             | 1.11             | 2.82               | 0.36              | 2.20             | 3.28               |
| V <sub>2</sub> WC <sub>2</sub>   | 0.35              | 1.66             | 3.36               | 1.07              | 0.83             | 2.63               | 0.17              | 2.07             | 3.19               |
| Cr <sub>2</sub> ScC <sub>2</sub> | 1.18              | 2.48             | 4.14               | 0.31              | 1.81             | 3.18               | 0.67              | 2.56             | 3.68               |
| Cr <sub>2</sub> VC <sub>2</sub>  | 0.19              | 1.53             | 3.16               | -0.41             | 1.04             | 2.74               | 0.51              | 2.56             | 3.38               |
| Cr <sub>2</sub> NbC <sub>2</sub> | 0.35              | 1.67             | 3.22               | -0.27             | 1.18             | 2.88               | 0.60              | 2.61             | 3.45               |
| Cr <sub>2</sub> MoC <sub>2</sub> | 0.02              | 1.55             | 2.99               | -0.29             | 1.09             | 2.89               | 0.49              | 2.36             | 3.38               |
| Cr <sub>2</sub> WC <sub>2</sub>  | 0.20              | 1.55             | 3.14               | -0.34             | 1.11             | 2.80               | 0.57              | 2.47             | 3.47               |
| Y <sub>2</sub> NbC <sub>2</sub>  | 1.54              | 1.62             | 3.29               | -0.27             | 1.28             | 2.87               | 0.58              | 3.24             | 3.42               |
| Zr <sub>2</sub> ScC <sub>2</sub> | 0.97              | 1.51             | 3.13               | 1.27              | 1.16             | 2.89               | 0.51              | 2.80             | 3.45               |
| Hf <sub>2</sub> ScC <sub>2</sub> | 0.32              | 1.73             | 3.29               | -0.35             | 1.10             | 2.80               | 0.43              | 2.18             | 3.38               |
| Sc <sub>2</sub> TiN <sub>2</sub> | -0.04             | 1.27             | 2.94               | -0.61             | 0.75             | 2.53               | 0.25              | 2.49             | 3.26               |
| Sc <sub>2</sub> VN <sub>2</sub>  | 0.42              | 1.39             | 2.98               | -0.55             | 0.92             | 2.59               | 0.42              | 2.54             | 3.30               |
| Sc <sub>2</sub> YN <sub>2</sub>  | 0.75              | 2.19             | 3.64               | 0.20              | 1.57             | 3.25               | 1.06              | 2.90             | 3.84               |
| Sc <sub>2</sub> MoN <sub>2</sub> | -0.02             | 1.31             | 2.96               | -0.61             | 0.76             | 2.53               | 0.74              | 2.18             | 3.29               |
| Sc <sub>2</sub> TaN <sub>2</sub> | -0.08             | 1.19             | 2.90               | -0.58             | 0.74             | 2.57               | 0.19              | 2.50             | 3.18               |
| Sc <sub>2</sub> WN <sub>2</sub>  | -0.03             | 1.24             | 2.96               | -0.79             | 0.48             | 2.35               | 0.74              | 2.40             | 3.08               |
| V <sub>2</sub> CrN <sub>2</sub>  | -0.06             | 1.23             | 2.32               | -0.52             | 0.83             | 2.04               | 0.41              | 2.44             | 2.78               |
| Cr <sub>2</sub> VN <sub>2</sub>  | 0.04              | 1.48             | 3.07               | -0.50             | 0.93             | 2.64               | 0.47              | 2.45             | 3.46               |
| Cr <sub>2</sub> NbN <sub>2</sub> | 0.10              | 1.49             | 3.11               | -0.47             | 0.99             | 2.67               | 0.55              | 2.62             | 3.37               |
| Cr <sub>2</sub> HfN <sub>2</sub> | 0.20              | 1.47             | 3.16               | -0.36             | 1.11             | 2.66               | 0.49              | 2.56             | 3.47               |
| Y <sub>2</sub> ScN <sub>2</sub>  | 0.77              | 2.16             | 3.68               | 0.04              | 1.62             | 3.33               | 1.00              | 2.90             | 3.81               |
| Mo <sub>2</sub> TaN <sub>2</sub> | -0.12             | 1.21             | 2.85               | -                 | -                | -                  | 0.61              | 2.30             | 3.43               |

**Table S4** Theoretical overpotentials for OER ( $\eta^{\text{OER}}$  in V) of doped  $M_2M'X_2O_2$  type MXene combinations.

| MXenes                               | Ni                  | Fe                  | Cu                  |
|--------------------------------------|---------------------|---------------------|---------------------|
|                                      | $\eta^{\text{OER}}$ | $\eta^{\text{OER}}$ | $\eta^{\text{OER}}$ |
| <b>Sc<sub>2</sub>CrC<sub>2</sub></b> | 0.75                | 1.13                | 0.44                |
| <b>Sc<sub>2</sub>HfC<sub>2</sub></b> | 0.65                | 0.67                | 0.63                |
| <b>Ti<sub>2</sub>ScC<sub>2</sub></b> | 0.33                | 2.19                | 1.03                |
| <b>V<sub>2</sub>ScC<sub>2</sub></b>  | 0.43                | 0.76                | 1.17                |
| <b>V<sub>2</sub>MoC<sub>2</sub></b>  | 0.42                | 1.02                | 0.58                |
| <b>V<sub>2</sub>TaC<sub>2</sub></b>  | 0.44                | 0.87                | 0.61                |
| <b>V<sub>2</sub>WC<sub>2</sub></b>   | 0.47                | 1.06                | 0.68                |
| <b>Cr<sub>2</sub>ScC<sub>2</sub></b> | 0.43                | 0.51                | 0.66                |
| <b>Cr<sub>2</sub>VC<sub>2</sub></b>  | 0.53                | 0.95                | 0.82                |
| <b>Cr<sub>2</sub>NbC<sub>2</sub></b> | 0.47                | 0.81                | 0.78                |
| <b>Cr<sub>2</sub>MoC<sub>2</sub></b> | 0.70                | 0.80                | 0.64                |
| <b>Cr<sub>2</sub>WC<sub>2</sub></b>  | 0.55                | 0.89                | 0.68                |
| <b>Y<sub>2</sub>NbC<sub>2</sub></b>  | 0.45                | 0.82                | 1.43                |
| <b>Zr<sub>2</sub>ScC<sub>2</sub></b> | 0.56                | 0.80                | 1.06                |
| <b>Hf<sub>2</sub>ScC<sub>2</sub></b> | 0.40                | 0.89                | 0.52                |
| <b>Sc<sub>2</sub>TiN<sub>2</sub></b> | 0.75                | 1.16                | 1.02                |
| <b>Sc<sub>2</sub>VN<sub>2</sub></b>  | 0.71                | 1.10                | 0.90                |
| <b>Sc<sub>2</sub>YN<sub>2</sub></b>  | 0.22                | 0.45                | 0.61                |
| <b>Sc<sub>2</sub>MoN<sub>2</sub></b> | 0.73                | 1.16                | 0.40                |
| <b>Sc<sub>2</sub>TaN<sub>2</sub></b> | 0.79                | 1.12                | 1.09                |
| <b>Sc<sub>2</sub>WN<sub>2</sub></b>  | 0.73                | 1.34                | 0.61                |
| <b>V<sub>2</sub>CrN<sub>2</sub></b>  | 1.37                | 1.65                | 0.91                |
| <b>Cr<sub>2</sub>VN<sub>2</sub></b>  | 0.62                | 1.05                | 0.75                |
| <b>Cr<sub>2</sub>NbN<sub>2</sub></b> | 0.58                | 1.02                | 0.83                |
| <b>Cr<sub>2</sub>HfN<sub>2</sub></b> | 0.53                | 1.03                | 0.84                |
| <b>Y<sub>2</sub>ScN<sub>2</sub></b>  | 0.29                | 0.48                | 0.66                |
| <b>Mo<sub>2</sub>TaN<sub>2</sub></b> | 0.84                | -                   | 0.46                |

**Table S5** Theoretical overpotentials for ORR ( $\eta^{\text{ORR}}$  in V) of doped  $M_2M'X_2O_2$  type MXene combinations.

| MXenes                               | Ni                  | Fe                  | Cu                  |
|--------------------------------------|---------------------|---------------------|---------------------|
|                                      | $\eta^{\text{ORR}}$ | $\eta^{\text{ORR}}$ | $\eta^{\text{ORR}}$ |
| <b>Sc<sub>2</sub>CrC<sub>2</sub></b> | 1.27                | 1.82                | 0.61                |
| <b>Sc<sub>2</sub>HfC<sub>2</sub></b> | 1.03                | 1.49                | 0.42                |
| <b>Ti<sub>2</sub>ScC<sub>2</sub></b> | 0.46                | 2.87                | 0.76                |
| <b>V<sub>2</sub>ScC<sub>2</sub></b>  | 0.71                | 1.52                | 0.90                |
| <b>V<sub>2</sub>MoC<sub>2</sub></b>  | 0.91                | 1.56                | 0.97                |
| <b>V<sub>2</sub>TaC<sub>2</sub></b>  | 0.87                | 1.56                | 0.87                |
| <b>V<sub>2</sub>WC<sub>2</sub></b>   | 0.88                | 1.47                | 1.06                |
| <b>Cr<sub>2</sub>ScC<sub>2</sub></b> | 0.45                | 0.92                | 0.56                |
| <b>Cr<sub>2</sub>VC<sub>2</sub></b>  | 1.04                | 1.64                | 0.72                |
| <b>Cr<sub>2</sub>NbC<sub>2</sub></b> | 0.88                | 1.50                | 0.63                |
| <b>Cr<sub>2</sub>MoC<sub>2</sub></b> | 1.21                | 1.52                | 0.74                |
| <b>Cr<sub>2</sub>WC<sub>2</sub></b>  | 1.03                | 1.57                | 0.66                |
| <b>Y<sub>2</sub>NbC<sub>2</sub></b>  | 1.15                | 1.50                | 1.04                |
| <b>Zr<sub>2</sub>ScC<sub>2</sub></b> | 0.69                | 1.34                | 0.72                |
| <b>Hf<sub>2</sub>ScC<sub>2</sub></b> | 0.91                | 1.58                | 0.80                |
| <b>Sc<sub>2</sub>TiN<sub>2</sub></b> | 1.27                | 1.84                | 0.98                |
| <b>Sc<sub>2</sub>VN<sub>2</sub></b>  | 0.81                | 1.78                | 0.81                |
| <b>Sc<sub>2</sub>YN<sub>2</sub></b>  | 0.48                | 1.03                | 0.28                |
| <b>Sc<sub>2</sub>MoN<sub>2</sub></b> | 1.25                | 1.84                | 0.49                |
| <b>Sc<sub>2</sub>TaN<sub>2</sub></b> | 1.31                | 1.81                | 1.04                |
| <b>Sc<sub>2</sub>WN<sub>2</sub></b>  | 1.26                | 2.02                | 0.55                |
| <b>V<sub>2</sub>CrN<sub>2</sub></b>  | 1.29                | 1.75                | 0.88                |
| <b>Cr<sub>2</sub>VN<sub>2</sub></b>  | 1.19                | 1.73                | 0.76                |
| <b>Cr<sub>2</sub>NbN<sub>2</sub></b> | 1.13                | 1.70                | 0.68                |
| <b>Cr<sub>2</sub>HfN<sub>2</sub></b> | 1.03                | 1.59                | 0.74                |
| <b>Y<sub>2</sub>ScN<sub>2</sub></b>  | 0.46                | 1.19                | 0.31                |
| <b>Mo<sub>2</sub>TaN<sub>2</sub></b> | 1.35                | -                   | 0.62                |

**Table S6** Hydrogen adsorption free energies ( $\Delta G_{H^*}$  in eV) for doped  $M_2M'X_2O_2$  type MXene combinations.

| MXenes                               | Ni               | Fe               | Cu               |
|--------------------------------------|------------------|------------------|------------------|
|                                      | $\Delta G_{H^*}$ | $\Delta G_{H^*}$ | $\Delta G_{H^*}$ |
| <b>Sc<sub>2</sub>CrC<sub>2</sub></b> | 0.05             | 0.09             | 0.04             |
| <b>Sc<sub>2</sub>HfC<sub>2</sub></b> | -0.86            | 0.91             | -0.76            |
| <b>Ti<sub>2</sub>ScC<sub>2</sub></b> | -0.29            | -1.86            | -0.50            |
| <b>V<sub>2</sub>ScC<sub>2</sub></b>  | -0.11            | -0.20            | -0.28            |
| <b>V<sub>2</sub>MoC<sub>2</sub></b>  | 0.10             | -0.02            | 0.02             |
| <b>V<sub>2</sub>TaC<sub>2</sub></b>  | -0.27            | -0.17            | -0.20            |
| <b>V<sub>2</sub>WC<sub>2</sub></b>   | -0.07            | 0.01             | -0.01            |
| <b>Cr<sub>2</sub>ScC<sub>2</sub></b> | -0.08            | -0.07            | -0.35            |
| <b>Cr<sub>2</sub>VC<sub>2</sub></b>  | -0.31            | -0.24            | -0.34            |
| <b>Cr<sub>2</sub>NbC<sub>2</sub></b> | -0.62            | -0.42            | -0.55            |
| <b>Cr<sub>2</sub>MoC<sub>2</sub></b> | -0.26            | -0.17            | -0.32            |
| <b>Cr<sub>2</sub>WC<sub>2</sub></b>  | -0.39            | -0.25            | -0.30            |
| <b>Y<sub>2</sub>NbC<sub>2</sub></b>  | -0.37            | -0.35            | -0.38            |
| <b>Zr<sub>2</sub>ScC<sub>2</sub></b> | -0.29            | -0.30            | -0.29            |
| <b>Hf<sub>2</sub>ScC<sub>2</sub></b> | -0.22            | -0.21            | -0.20            |
| <b>Sc<sub>2</sub>TiN<sub>2</sub></b> | 0.21             | 0.27             | 0.26             |
| <b>Sc<sub>2</sub>VN<sub>2</sub></b>  | -0.01            | 0.13             | -0.04            |
| <b>Sc<sub>2</sub>YN<sub>2</sub></b>  | -1.24            | -1.18            | -1.34            |
| <b>Sc<sub>2</sub>MoN<sub>2</sub></b> | 0.34             | 0.36             | 0.22             |
| <b>Sc<sub>2</sub>TaN<sub>2</sub></b> | 0.15             | 0.34             | 0.26             |
| <b>Sc<sub>2</sub>WN<sub>2</sub></b>  | 0.90             | 0.62             | 0.62             |
| <b>V<sub>2</sub>CrN<sub>2</sub></b>  | 0.12             | 0.17             | 0.08             |
| <b>Cr<sub>2</sub>VN<sub>2</sub></b>  | -0.03            | 0.00             | -0.10            |
| <b>Cr<sub>2</sub>NbN<sub>2</sub></b> | -0.06            | -0.17            | -0.12            |
| <b>Cr<sub>2</sub>HfN<sub>2</sub></b> | -0.12            | -0.10            | -0.22            |
| <b>Y<sub>2</sub>ScN<sub>2</sub></b>  | -1.12            | -1.06            | -1.15            |
| <b>Mo<sub>2</sub>TaN<sub>2</sub></b> | 0.10             | 0.32             | 0.48             |

**Table S7** Reaction free energies (eV) of elementary steps for OER in Ni-doped  $M_2M'X_2O_2$  type MXene combinations.

| <b>MXenes</b>                        | <b><math>\Delta G_1</math></b> | <b><math>\Delta G_2</math></b> | <b><math>\Delta G_3</math></b> | <b><math>\Delta G_4</math></b> |
|--------------------------------------|--------------------------------|--------------------------------|--------------------------------|--------------------------------|
| <b>Sc<sub>2</sub>CrC<sub>2</sub></b> | -0.04                          | 1.28                           | 1.70                           | 1.98                           |
| <b>Sc<sub>2</sub>HfC<sub>2</sub></b> | 0.20                           | 1.22                           | 1.62                           | 1.88                           |
| <b>Ti<sub>2</sub>ScC<sub>2</sub></b> | 0.77                           | 1.03                           | 1.56                           | 1.56                           |
| <b>V<sub>2</sub>ScC<sub>2</sub></b>  | 0.52                           | 1.33                           | 1.66                           | 1.42                           |
| <b>V<sub>2</sub>MoC<sub>2</sub></b>  | 0.32                           | 1.33                           | 1.65                           | 1.62                           |
| <b>V<sub>2</sub>TaC<sub>2</sub></b>  | 0.36                           | 1.31                           | 1.67                           | 1.58                           |
| <b>V<sub>2</sub>WC<sub>2</sub></b>   | 0.35                           | 1.30                           | 1.70                           | 1.56                           |
| <b>Cr<sub>2</sub>ScC<sub>2</sub></b> | 1.18                           | 1.29                           | 1.66                           | 0.78                           |
| <b>Cr<sub>2</sub>VC<sub>2</sub></b>  | 0.19                           | 1.33                           | 1.64                           | 1.76                           |
| <b>Cr<sub>2</sub>NbC<sub>2</sub></b> | 0.35                           | 1.32                           | 1.54                           | 1.70                           |
| <b>Cr<sub>2</sub>MoC<sub>2</sub></b> | 0.02                           | 1.53                           | 1.45                           | 1.93                           |
| <b>Cr<sub>2</sub>WC<sub>2</sub></b>  | 0.20                           | 1.35                           | 1.59                           | 1.78                           |
| <b>Y<sub>2</sub>NbC<sub>2</sub></b>  | 1.54                           | 0.08                           | 1.68                           | 1.63                           |
| <b>Zr<sub>2</sub>ScC<sub>2</sub></b> | 0.97                           | 0.54                           | 1.63                           | 1.79                           |
| <b>Hf<sub>2</sub>ScC<sub>2</sub></b> | 0.32                           | 1.41                           | 1.57                           | 1.63                           |
| <b>Sc<sub>2</sub>TiN<sub>2</sub></b> | -0.04                          | 1.30                           | 1.68                           | 1.98                           |
| <b>Sc<sub>2</sub>VN<sub>2</sub></b>  | 0.42                           | 0.97                           | 1.59                           | 1.94                           |
| <b>Sc<sub>2</sub>YN<sub>2</sub></b>  | 0.75                           | 1.44                           | 1.45                           | 1.28                           |
| <b>Sc<sub>2</sub>MoN<sub>2</sub></b> | -0.02                          | 1.33                           | 1.65                           | 1.96                           |
| <b>Sc<sub>2</sub>TaN<sub>2</sub></b> | -0.08                          | 1.27                           | 1.72                           | 2.02                           |
| <b>Sc<sub>2</sub>WN<sub>2</sub></b>  | -0.03                          | 1.27                           | 1.72                           | 1.96                           |
| <b>V<sub>2</sub>CrN<sub>2</sub></b>  | -0.06                          | 1.29                           | 1.09                           | 2.60                           |
| <b>Cr<sub>2</sub>VN<sub>2</sub></b>  | 0.04                           | 1.44                           | 1.59                           | 1.85                           |
| <b>Cr<sub>2</sub>NbN<sub>2</sub></b> | 0.10                           | 1.39                           | 1.62                           | 1.81                           |
| <b>Cr<sub>2</sub>HfN<sub>2</sub></b> | 0.20                           | 1.27                           | 1.69                           | 1.76                           |
| <b>Y<sub>2</sub>ScN<sub>2</sub></b>  | 0.77                           | 1.39                           | 1.52                           | 1.24                           |
| <b>Mo<sub>2</sub>TaN<sub>2</sub></b> | -0.12                          | 1.32                           | 1.65                           | 2.07                           |

**Table S8** Reaction free energies (eV) of elementary steps for OER in Fe-doped  $M_2M'X_2O_2$  type MXene combinations.

| <b>MXenes</b>                        | <b><math>\Delta G_1</math></b> | <b><math>\Delta G_2</math></b> | <b><math>\Delta G_3</math></b> | <b><math>\Delta G_4</math></b> |
|--------------------------------------|--------------------------------|--------------------------------|--------------------------------|--------------------------------|
| <b>Sc<sub>2</sub>CrC<sub>2</sub></b> | -0.59                          | 1.40                           | 1.74                           | 2.36                           |
| <b>Sc<sub>2</sub>HfC<sub>2</sub></b> | -0.26                          | 1.90                           | 1.49                           | 1.79                           |
| <b>Ti<sub>2</sub>ScC<sub>2</sub></b> | -1.64                          | 1.62                           | 1.52                           | 3.42                           |
| <b>V<sub>2</sub>ScC<sub>2</sub></b>  | -0.29                          | 1.44                           | 1.78                           | 1.99                           |
| <b>V<sub>2</sub>MoC<sub>2</sub></b>  | -0.33                          | 1.17                           | 1.82                           | 2.25                           |
| <b>V<sub>2</sub>TaC<sub>2</sub></b>  | -0.33                          | 1.44                           | 1.71                           | 2.10                           |
| <b>V<sub>2</sub>WC<sub>2</sub></b>   | 1.07                           | -0.24                          | 1.80                           | 2.29                           |
| <b>Cr<sub>2</sub>ScC<sub>2</sub></b> | 0.31                           | 1.50                           | 1.38                           | 1.74                           |
| <b>Cr<sub>2</sub>VC<sub>2</sub></b>  | -0.41                          | 1.44                           | 1.70                           | 2.18                           |
| <b>Cr<sub>2</sub>NbC<sub>2</sub></b> | -0.27                          | 1.45                           | 1.70                           | 2.04                           |
| <b>Cr<sub>2</sub>MoC<sub>2</sub></b> | -0.29                          | 1.37                           | 1.81                           | 2.03                           |
| <b>Cr<sub>2</sub>WC<sub>2</sub></b>  | -0.34                          | 1.45                           | 1.70                           | 2.12                           |
| <b>Y<sub>2</sub>NbC<sub>2</sub></b>  | -0.27                          | 1.55                           | 1.59                           | 2.05                           |
| <b>Zr<sub>2</sub>ScC<sub>2</sub></b> | 1.27                           | -0.11                          | 1.73                           | 2.03                           |
| <b>Hf<sub>2</sub>ScC<sub>2</sub></b> | -0.35                          | 1.45                           | 1.70                           | 2.12                           |
| <b>Sc<sub>2</sub>TiN<sub>2</sub></b> | -0.61                          | 1.36                           | 1.79                           | 2.39                           |
| <b>Sc<sub>2</sub>VN<sub>2</sub></b>  | -0.55                          | 1.47                           | 1.67                           | 2.33                           |
| <b>Sc<sub>2</sub>YN<sub>2</sub></b>  | 0.20                           | 1.37                           | 1.68                           | 1.67                           |
| <b>Sc<sub>2</sub>MoN<sub>2</sub></b> | -0.61                          | 1.38                           | 1.77                           | 2.39                           |
| <b>Sc<sub>2</sub>TaN<sub>2</sub></b> | -0.58                          | 1.32                           | 1.83                           | 2.35                           |
| <b>Sc<sub>2</sub>WN<sub>2</sub></b>  | -0.79                          | 1.27                           | 1.88                           | 2.57                           |
| <b>V<sub>2</sub>CrN<sub>2</sub></b>  | -0.52                          | 1.35                           | 1.21                           | 2.88                           |
| <b>Cr<sub>2</sub>VN<sub>2</sub></b>  | -0.50                          | 1.43                           | 1.71                           | 2.28                           |
| <b>Cr<sub>2</sub>NbN<sub>2</sub></b> | -0.47                          | 1.46                           | 1.69                           | 2.25                           |
| <b>Cr<sub>2</sub>HfN<sub>2</sub></b> | -0.36                          | 1.48                           | 1.55                           | 2.26                           |
| <b>Y<sub>2</sub>ScN<sub>2</sub></b>  | 0.04                           | 1.58                           | 1.71                           | 1.59                           |
| <b>Mo<sub>2</sub>TaN<sub>2</sub></b> | -                              | -                              | -                              | -                              |

**Table S9** Reaction free energies (eV) of elementary steps for OER in Cu-doped  $M_2M'X_2O_2$  type MXene combinations.

| MXenes                               | $\Delta G_1$ | $\Delta G_2$ | $\Delta G_3$ | $\Delta G_4$ |
|--------------------------------------|--------------|--------------|--------------|--------------|
| <b>Sc<sub>2</sub>CrC<sub>2</sub></b> | 0.62         | 1.67         | 1.10         | 1.53         |
| <b>Sc<sub>2</sub>HfC<sub>2</sub></b> | 0.81         | 1.86         | 0.88         | 1.37         |
| <b>Ti<sub>2</sub>ScC<sub>2</sub></b> | 0.75         | 2.26         | 0.47         | 1.44         |
| <b>V<sub>2</sub>ScC<sub>2</sub></b>  | 0.33         | 2.40         | 0.50         | 1.68         |
| <b>V<sub>2</sub>MoC<sub>2</sub></b>  | 0.26         | 1.81         | 1.15         | 1.70         |
| <b>V<sub>2</sub>TaC<sub>2</sub></b>  | 0.36         | 1.84         | 1.08         | 1.64         |
| <b>V<sub>2</sub>WC<sub>2</sub></b>   | 0.17         | 1.91         | 1.12         | 1.73         |
| <b>Cr<sub>2</sub>ScC<sub>2</sub></b> | 0.67         | 1.89         | 1.12         | 1.24         |
| <b>Cr<sub>2</sub>VC<sub>2</sub></b>  | 0.51         | 2.05         | 0.82         | 1.54         |
| <b>Cr<sub>2</sub>NbC<sub>2</sub></b> | 0.60         | 2.01         | 0.84         | 1.47         |
| <b>Cr<sub>2</sub>MoC<sub>2</sub></b> | 0.49         | 1.87         | 1.02         | 1.54         |
| <b>Cr<sub>2</sub>WC<sub>2</sub></b>  | 0.57         | 1.91         | 1.00         | 1.45         |
| <b>Y<sub>2</sub>NbC<sub>2</sub></b>  | 0.58         | 2.66         | 0.19         | 1.50         |
| <b>Zr<sub>2</sub>ScC<sub>2</sub></b> | 0.51         | 2.29         | 0.66         | 1.47         |
| <b>Hf<sub>2</sub>ScC<sub>2</sub></b> | 0.43         | 1.75         | 1.20         | 1.54         |
| <b>Sc<sub>2</sub>TiN<sub>2</sub></b> | 0.25         | 2.25         | 0.77         | 1.66         |
| <b>Sc<sub>2</sub>VN<sub>2</sub></b>  | 0.42         | 2.13         | 0.75         | 1.62         |
| <b>Sc<sub>2</sub>YN<sub>2</sub></b>  | 1.05         | 1.84         | 0.95         | 1.08         |
| <b>Sc<sub>2</sub>MoN<sub>2</sub></b> | 0.74         | 1.45         | 1.11         | 1.63         |
| <b>Sc<sub>2</sub>TaN<sub>2</sub></b> | 0.19         | 2.32         | 0.68         | 1.74         |
| <b>Sc<sub>2</sub>WN<sub>2</sub></b>  | 0.74         | 1.65         | 0.68         | 1.84         |
| <b>V<sub>2</sub>CrN<sub>2</sub></b>  | 0.41         | 2.03         | 0.35         | 2.14         |
| <b>Cr<sub>2</sub>VN<sub>2</sub></b>  | 0.47         | 1.98         | 1.01         | 1.46         |
| <b>Cr<sub>2</sub>NbN<sub>2</sub></b> | 0.55         | 2.06         | 0.76         | 1.55         |
| <b>Cr<sub>2</sub>HfN<sub>2</sub></b> | 0.49         | 2.07         | 0.92         | 1.45         |
| <b>Y<sub>2</sub>ScN<sub>2</sub></b>  | 1.00         | 1.89         | 0.92         | 1.11         |
| <b>Mo<sub>2</sub>TaN<sub>2</sub></b> | 0.61         | 1.69         | 1.13         | 1.49         |

**Table S10** Reaction free energies (eV) of elementary steps for ORR in Ni-doped  $M_2M'X_2O_2$  type MXene combinations.

| <b>MXenes</b>                        | <b><math>\Delta G_1</math></b> | <b><math>\Delta G_2</math></b> | <b><math>\Delta G_3</math></b> | <b><math>\Delta G_4</math></b> |
|--------------------------------------|--------------------------------|--------------------------------|--------------------------------|--------------------------------|
| <b>Sc<sub>2</sub>CrC<sub>2</sub></b> | -1.98                          | -1.70                          | -1.28                          | 0.04                           |
| <b>Sc<sub>2</sub>HfC<sub>2</sub></b> | -1.88                          | -1.62                          | -1.22                          | -0.20                          |
| <b>Ti<sub>2</sub>ScC<sub>2</sub></b> | -1.56                          | -1.56                          | -1.03                          | -0.77                          |
| <b>V<sub>2</sub>ScC<sub>2</sub></b>  | -1.42                          | -1.66                          | -1.33                          | -0.52                          |
| <b>V<sub>2</sub>MoC<sub>2</sub></b>  | -1.62                          | -1.65                          | -1.33                          | -0.32                          |
| <b>V<sub>2</sub>TaC<sub>2</sub></b>  | -1.58                          | -1.67                          | -1.31                          | -0.36                          |
| <b>V<sub>2</sub>WC<sub>2</sub></b>   | -1.56                          | -1.70                          | -1.30                          | -0.35                          |
| <b>Cr<sub>2</sub>ScC<sub>2</sub></b> | -0.78                          | -1.66                          | -1.29                          | -1.18                          |
| <b>Cr<sub>2</sub>VC<sub>2</sub></b>  | -1.76                          | -1.64                          | -1.33                          | -0.19                          |
| <b>Cr<sub>2</sub>NbC<sub>2</sub></b> | -1.70                          | -1.54                          | -1.32                          | -0.35                          |
| <b>Cr<sub>2</sub>MoC<sub>2</sub></b> | -1.93                          | -1.45                          | -1.53                          | -0.02                          |
| <b>Cr<sub>2</sub>WC<sub>2</sub></b>  | -1.78                          | -1.59                          | -1.35                          | -0.20                          |
| <b>Y<sub>2</sub>NbC<sub>2</sub></b>  | -1.63                          | -1.68                          | -0.08                          | -1.54                          |
| <b>Zr<sub>2</sub>ScC<sub>2</sub></b> | -1.79                          | -1.63                          | -0.54                          | -0.97                          |
| <b>Hf<sub>2</sub>ScC<sub>2</sub></b> | -1.63                          | -1.57                          | -1.41                          | -0.32                          |
| <b>Sc<sub>2</sub>TiN<sub>2</sub></b> | -1.98                          | -1.68                          | -1.30                          | 0.04                           |
| <b>Sc<sub>2</sub>VN<sub>2</sub></b>  | -1.94                          | -1.59                          | -0.97                          | -0.42                          |
| <b>Sc<sub>2</sub>YN<sub>2</sub></b>  | -1.28                          | -1.45                          | -1.44                          | -0.75                          |
| <b>Sc<sub>2</sub>MoN<sub>2</sub></b> | -1.96                          | -1.65                          | -1.33                          | 0.02                           |
| <b>Sc<sub>2</sub>TaN<sub>2</sub></b> | -2.02                          | -1.72                          | -1.27                          | 0.08                           |
| <b>Sc<sub>2</sub>WN<sub>2</sub></b>  | -1.96                          | -1.72                          | -1.27                          | 0.03                           |
| <b>V<sub>2</sub>CrN<sub>2</sub></b>  | -2.60                          | -1.09                          | -1.29                          | 0.06                           |
| <b>Cr<sub>2</sub>VN<sub>2</sub></b>  | -1.85                          | -1.59                          | -1.44                          | -0.04                          |
| <b>Cr<sub>2</sub>NbN<sub>2</sub></b> | -1.81                          | -1.62                          | -1.39                          | -0.10                          |
| <b>Cr<sub>2</sub>HfN<sub>2</sub></b> | -1.76                          | -1.69                          | -1.27                          | -0.20                          |
| <b>Y<sub>2</sub>ScN<sub>2</sub></b>  | -1.24                          | -1.52                          | -1.39                          | -0.77                          |
| <b>Mo<sub>2</sub>TaN<sub>2</sub></b> | -2.07                          | -1.65                          | -1.32                          | 0.12                           |



**Table S11** Reaction free energies (eV) of elementary steps for ORR in Fe-doped  $M_2M'X_2O_2$  type MXene combinations.

| <b>MXenes</b>                        | <b><math>\Delta G_1</math></b> | <b><math>\Delta G_2</math></b> | <b><math>\Delta G_3</math></b> | <b><math>\Delta G_4</math></b> |
|--------------------------------------|--------------------------------|--------------------------------|--------------------------------|--------------------------------|
| <b>Sc<sub>2</sub>CrC<sub>2</sub></b> | -2.36                          | -1.74                          | -1.40                          | 0.59                           |
| <b>Sc<sub>2</sub>HfC<sub>2</sub></b> | -1.79                          | -1.49                          | -1.90                          | 0.26                           |
| <b>Ti<sub>2</sub>ScC<sub>2</sub></b> | -3.42                          | -1.52                          | -1.62                          | 1.64                           |
| <b>V<sub>2</sub>ScC<sub>2</sub></b>  | -1.99                          | -1.78                          | -1.44                          | 0.29                           |
| <b>V<sub>2</sub>MoC<sub>2</sub></b>  | -2.25                          | -1.82                          | -1.17                          | 0.33                           |
| <b>V<sub>2</sub>TaC<sub>2</sub></b>  | -2.10                          | -1.71                          | -1.44                          | 0.33                           |
| <b>V<sub>2</sub>WC<sub>2</sub></b>   | -2.29                          | -1.80                          | 0.24                           | -1.07                          |
| <b>Cr<sub>2</sub>ScC<sub>2</sub></b> | -1.74                          | -1.38                          | -1.50                          | -0.31                          |
| <b>Cr<sub>2</sub>VC<sub>2</sub></b>  | -2.18                          | -1.70                          | -1.44                          | 0.41                           |
| <b>Cr<sub>2</sub>NbC<sub>2</sub></b> | -2.04                          | -1.70                          | -1.45                          | 0.27                           |
| <b>Cr<sub>2</sub>MoC<sub>2</sub></b> | -2.03                          | -1.81                          | -1.37                          | 0.29                           |
| <b>Cr<sub>2</sub>WC<sub>2</sub></b>  | -2.12                          | -1.70                          | -1.45                          | 0.34                           |
| <b>Y<sub>2</sub>NbC<sub>2</sub></b>  | -2.05                          | -1.59                          | -1.55                          | 0.27                           |
| <b>Zr<sub>2</sub>ScC<sub>2</sub></b> | -2.03                          | -1.73                          | 0.11                           | -1.27                          |
| <b>Hf<sub>2</sub>ScC<sub>2</sub></b> | -2.12                          | -1.70                          | -1.45                          | 0.35                           |
| <b>Sc<sub>2</sub>TiN<sub>2</sub></b> | -2.39                          | -1.79                          | -1.36                          | 0.61                           |
| <b>Sc<sub>2</sub>VN<sub>2</sub></b>  | -2.33                          | -1.67                          | -1.47                          | 0.55                           |
| <b>Sc<sub>2</sub>YN<sub>2</sub></b>  | -1.67                          | -1.68                          | -1.37                          | -0.20                          |
| <b>Sc<sub>2</sub>MoN<sub>2</sub></b> | -2.39                          | -1.77                          | -1.38                          | 0.61                           |
| <b>Sc<sub>2</sub>TaN<sub>2</sub></b> | -2.35                          | -1.83                          | -1.32                          | 0.58                           |
| <b>Sc<sub>2</sub>WN<sub>2</sub></b>  | -2.57                          | -1.88                          | -1.27                          | 0.79                           |
| <b>V<sub>2</sub>CrN<sub>2</sub></b>  | -2.88                          | -1.21                          | -1.35                          | 0.52                           |
| <b>Cr<sub>2</sub>VN<sub>2</sub></b>  | -2.28                          | -1.71                          | -1.43                          | 0.50                           |
| <b>Cr<sub>2</sub>NbN<sub>2</sub></b> | -2.25                          | -1.69                          | -1.46                          | 0.47                           |
| <b>Cr<sub>2</sub>HfN<sub>2</sub></b> | -2.26                          | -1.55                          | -1.48                          | 0.36                           |
| <b>Y<sub>2</sub>ScN<sub>2</sub></b>  | -1.59                          | -1.71                          | -1.58                          | -0.04                          |
| <b>Mo<sub>2</sub>TaN<sub>2</sub></b> | -                              | -                              | -                              | -                              |

**Table S12** Reaction free energies (eV) of elementary steps for ORR in Cu-doped  $M_2M'X_2O_2$  type MXene combinations.

| <b>MXenes</b>                        | <b><math>\Delta G_1</math></b> | <b><math>\Delta G_2</math></b> | <b><math>\Delta G_3</math></b> | <b><math>\Delta G_4</math></b> |
|--------------------------------------|--------------------------------|--------------------------------|--------------------------------|--------------------------------|
| <b>Sc<sub>2</sub>CrC<sub>2</sub></b> | -1.53                          | -1.10                          | -1.67                          | -0.62                          |
| <b>Sc<sub>2</sub>HfC<sub>2</sub></b> | -1.37                          | -0.88                          | -1.86                          | -0.81                          |
| <b>Ti<sub>2</sub>ScC<sub>2</sub></b> | -1.44                          | -0.47                          | -2.26                          | -0.75                          |
| <b>V<sub>2</sub>ScC<sub>2</sub></b>  | -1.68                          | -0.50                          | -2.40                          | -0.33                          |
| <b>V<sub>2</sub>MoC<sub>2</sub></b>  | -1.70                          | -1.15                          | -1.81                          | -0.26                          |
| <b>V<sub>2</sub>TaC<sub>2</sub></b>  | -1.64                          | -1.08                          | -1.84                          | -0.36                          |
| <b>V<sub>2</sub>WC<sub>2</sub></b>   | -1.73                          | -1.12                          | -1.91                          | -0.17                          |
| <b>Cr<sub>2</sub>ScC<sub>2</sub></b> | -1.24                          | -1.12                          | -1.89                          | -0.67                          |
| <b>Cr<sub>2</sub>VC<sub>2</sub></b>  | -1.54                          | -0.82                          | -2.05                          | -0.51                          |
| <b>Cr<sub>2</sub>NbC<sub>2</sub></b> | -1.47                          | -0.84                          | -2.01                          | -0.60                          |
| <b>Cr<sub>2</sub>MoC<sub>2</sub></b> | -1.54                          | -1.02                          | -1.87                          | -0.49                          |
| <b>Cr<sub>2</sub>WC<sub>2</sub></b>  | -1.45                          | -1.00                          | -1.91                          | -0.57                          |
| <b>Y<sub>2</sub>NbC<sub>2</sub></b>  | -1.50                          | -0.19                          | -2.66                          | -0.58                          |
| <b>Zr<sub>2</sub>ScC<sub>2</sub></b> | -1.47                          | -0.66                          | -2.29                          | -0.51                          |
| <b>Hf<sub>2</sub>ScC<sub>2</sub></b> | -1.54                          | -1.20                          | -1.75                          | -0.43                          |
| <b>Sc<sub>2</sub>TiN<sub>2</sub></b> | -1.66                          | -0.77                          | -2.25                          | -0.25                          |
| <b>Sc<sub>2</sub>VN<sub>2</sub></b>  | -1.62                          | -0.75                          | -2.13                          | -0.42                          |
| <b>Sc<sub>2</sub>YN<sub>2</sub></b>  | -1.08                          | -0.95                          | -1.84                          | -1.05                          |
| <b>Sc<sub>2</sub>MoN<sub>2</sub></b> | -1.63                          | -1.11                          | -1.45                          | -0.74                          |
| <b>Sc<sub>2</sub>TaN<sub>2</sub></b> | -1.74                          | -0.68                          | -2.32                          | -0.19                          |
| <b>Sc<sub>2</sub>WN<sub>2</sub></b>  | -1.84                          | -0.68                          | -1.65                          | -0.74                          |
| <b>V<sub>2</sub>CrN<sub>2</sub></b>  | -2.14                          | -0.35                          | -2.03                          | -0.41                          |
| <b>Cr<sub>2</sub>VN<sub>2</sub></b>  | -1.46                          | -1.01                          | -1.98                          | -0.47                          |
| <b>Cr<sub>2</sub>NbN<sub>2</sub></b> | -1.55                          | -0.76                          | -2.06                          | -0.55                          |
| <b>Cr<sub>2</sub>HfN<sub>2</sub></b> | -1.45                          | -0.92                          | -2.07                          | -0.49                          |
| <b>Y<sub>2</sub>ScN<sub>2</sub></b>  | -1.11                          | -0.92                          | -1.89                          | -1.00                          |
| <b>Mo<sub>2</sub>TaN<sub>2</sub></b> | -1.49                          | -1.13                          | -1.69                          | -0.61                          |

**Table S13** The difference between zero-point energy changes ( $\Delta ZPE$ ) and entropic energy contributions ( $T\Delta S$ ) in eV for all intermediates at 298.15K.

|                          | <i><math>\Delta ZPE - T\Delta S</math></i> |
|--------------------------|--------------------------------------------|
| <b>Pristine</b>          | 0                                          |
| <b>OH*</b>               | 0.26                                       |
| <b>O*</b>                | -0.075                                     |
| <b>OOH*</b>              | 0.206                                      |
| <b>H*</b>                | 0.26                                       |
| <b>0.5 H<sub>2</sub></b> | -0.06                                      |
| <b>H<sub>2</sub>O</b>    | -0.1                                       |

**Table S14** Overpotentials of efficient OER and ORR ( $\eta^{\text{OER}}$  in V) catalysts for MXenes with the solvent effect (dielectric constant : 80). The results in the absence of solvent effect are in parentheses.

| <b>MXenes</b>                                        | $\eta^{\text{OER}}$ | $\eta^{\text{ORR}}$ |
|------------------------------------------------------|---------------------|---------------------|
| <b>Ni-Sc<sub>2</sub>YN<sub>2</sub>O<sub>2</sub></b>  | 0.25 (0.22)         | 0.41 (0.48)         |
| <b>Ni-Ti<sub>2</sub>ScC<sub>2</sub>O<sub>2</sub></b> | 0.27 (0.33)         | 0.48 (0.46)         |
| <b>Ni-Y<sub>2</sub>ScN<sub>2</sub>O<sub>2</sub></b>  | 0.24 (0.29)         | 0.40 (0.46)         |
| <b>Ni-Cr<sub>2</sub>ScC<sub>2</sub>O<sub>2</sub></b> | 0.45 (0.43)         | 0.42 (0.45)         |
| <b>Cu-Sc<sub>2</sub>MoN<sub>2</sub>O<sub>2</sub></b> | 0.44 (0.40)         | 0.57 (0.49)         |
| <b>Cu-Sc<sub>2</sub>CrC<sub>2</sub>O<sub>2</sub></b> | 0.41 (0.44)         | 0.53 (0.61)         |

**Table S15**  $\Delta G_{H^*}$  (eV) for HER in the presence of solvent effect for most efficient MXenes with  $|\Delta G_{H^*}| \leq 0.02$  eV. The results in the absence of solvent effect are in parentheses.

| MXenes                                              | HER ( $ \Delta G_{H^*} $ ) |
|-----------------------------------------------------|----------------------------|
| <b>Fe-Cr<sub>2</sub>VN<sub>2</sub>O<sub>2</sub></b> | 0.017 (0.004)              |
| <b>Fe-V<sub>2</sub>WC<sub>2</sub>O<sub>2</sub></b>  | 0.015 (0.007)              |
| <b>Ni-Sc<sub>2</sub>VN<sub>2</sub>O<sub>2</sub></b> | 0.009 (0.007)              |
| <b>Cu-V<sub>2</sub>WC<sub>2</sub>O<sub>2</sub></b>  | 0.025 (0.013)              |
| <b>Cu-V<sub>2</sub>MoC<sub>2</sub>O<sub>2</sub></b> | 0.015 (0.017)              |
| <b>Fe-V<sub>2</sub>MoC<sub>2</sub>O<sub>2</sub></b> | 0.039 (0.019)              |

**Table S16** The Bader charge transfer (e<sup>-</sup>/atom) from doped TM to adsorbed O atom for O\* intermediate of efficient bifunctional catalysts. The negative and positive signs indicate the gain and loss of charge, respectively.

| MXenes                                               | O*     | Doped-TM |
|------------------------------------------------------|--------|----------|
| <b>Ni-Sc<sub>2</sub>YN<sub>2</sub>O<sub>2</sub></b>  | -0.509 | 1.08     |
| <b>Ni-Ti<sub>2</sub>ScC<sub>2</sub>O<sub>2</sub></b> | -0.610 | 1.99     |
| <b>Ni-Y<sub>2</sub>ScN<sub>2</sub>O<sub>2</sub></b>  | -0.508 | 1.14     |
| <b>Ni-Cr<sub>2</sub>ScC<sub>2</sub>O<sub>2</sub></b> | -0.445 | 1.17     |
| <b>Cu-Sc<sub>2</sub>MoN<sub>2</sub>O<sub>2</sub></b> | -0.490 | 0.84     |

**Table S17** Hydrogen adsorption energies ( $E_{\text{ad}} = E_{\text{Mx+H}} - E_{\text{Mx}} - E_{\text{H}}$  in eV) for Ni-doped  $\text{M}_2\text{M}'\text{X}_2\text{O}_2$  type MXene combinations. The considered sites are S1, S2, and S3.

| MXenes                               | Ni-doped |       |       |
|--------------------------------------|----------|-------|-------|
|                                      | S1       | S2    | S3    |
| <b>Sc<sub>2</sub>CrC<sub>2</sub></b> | 0.24     | 0.18  | -0.31 |
| <b>Sc<sub>2</sub>HfC<sub>2</sub></b> | -1.01    | -0.96 | -1.22 |
| <b>Ti<sub>2</sub>ScC<sub>2</sub></b> | -0.44    | 0.93  | -0.65 |
| <b>V<sub>2</sub>ScC<sub>2</sub></b>  | -0.41    | 0.64  | -0.48 |
| <b>V<sub>2</sub>MoC<sub>2</sub></b>  | -0.07    | 0.69  | -0.26 |
| <b>V<sub>2</sub>TaC<sub>2</sub></b>  | -0.38    | 2.65  | -0.64 |
| <b>V<sub>2</sub>WC<sub>2</sub></b>   | -0.04    | 0.22  | -0.43 |
| <b>Cr<sub>2</sub>ScC<sub>2</sub></b> | -0.81    | 0.75  | -0.65 |
| <b>Cr<sub>2</sub>VC<sub>2</sub></b>  | -0.55    | 0.54  | -0.68 |
| <b>Cr<sub>2</sub>NbC<sub>2</sub></b> | -0.88    | 0.29  | -0.99 |
| <b>Cr<sub>2</sub>MoC<sub>2</sub></b> | -0.58    | -     | -0.62 |
| <b>Cr<sub>2</sub>WC<sub>2</sub></b>  | -0.69    | 0.60  | -0.76 |
| <b>Y<sub>2</sub>NbC<sub>2</sub></b>  | -0.34    | 0.75  | -0.73 |
| <b>Zr<sub>2</sub>ScC<sub>2</sub></b> | -0.43    | -     | -0.66 |
| <b>Hf<sub>2</sub>ScC<sub>2</sub></b> | -0.23    | -     | -0.58 |
| <b>Sc<sub>2</sub>TiN<sub>2</sub></b> | 0.14     | 1.02  | -0.15 |
| <b>Sc<sub>2</sub>VN<sub>2</sub></b>  | -0.01    | 0.34  | -0.37 |
| <b>Sc<sub>2</sub>YN<sub>2</sub></b>  | -0.96    | 1.13  | -1.61 |
| <b>Sc<sub>2</sub>MoN<sub>2</sub></b> | 0.11     | -     | -0.02 |
| <b>Sc<sub>2</sub>TaN<sub>2</sub></b> | 0.10     | 1.56  | -0.22 |
| <b>Sc<sub>2</sub>WN<sub>2</sub></b>  | 0.56     | -     | 0.54  |
| <b>V<sub>2</sub>CrN<sub>2</sub></b>  | -0.20    | 0.25  | -0.25 |
| <b>Cr<sub>2</sub>VN<sub>2</sub></b>  | -0.33    | 0.45  | -0.39 |
| <b>Cr<sub>2</sub>NbN<sub>2</sub></b> | -0.12    | 0.67  | -0.43 |
| <b>Cr<sub>2</sub>HfN<sub>2</sub></b> | -0.29    | 0.06  | -0.48 |
| <b>Y<sub>2</sub>ScN<sub>2</sub></b>  | -0.77    | -     | -1.48 |
| <b>Mo<sub>2</sub>TaN<sub>2</sub></b> | -0.12    | 0.74  | -0.27 |

“-” denotes the unstable intermediate.
